## Highlights

- The EBV miR-BHRF1 microRNAs do not upregulate B cell growth in *trans*.
- EBNA-LP expression is downregulated by pri-miR-BHRF1-2 and 1-3 acting in *cis*.
- Loss of miR-BHRF1-2 and 1-3 causes EBNA-LP overexpression and inhibits B cell growth.
- Novel alternative splicing of EBV Cp/Wp transcripts was identified.

1  
2  
3  
4 **The Epstein-Barr Virus miR-BHRF1 microRNAs Regulate Viral Gene Expression in *cis***  
5

6  
7  
8 Brigid Chiyoko Poling, Alexander M. Price<sup>1</sup>, Micah A. Luftig, and Bryan R. Cullen\*

9  
10 Department of Molecular Genetics & Microbiology and Center for Virology, Duke University

11  
12 Medical Center, Durham, North Carolina

13  
14  
15  
16  
17 \*Correspondence: [bryan.cullen@duke.edu](mailto:bryan.cullen@duke.edu)

18  
19  
20 <sup>1</sup> Present address: Pathology and Laboratory Medicine, The Children's Hospital of Philadelphia,  
21  
22 3501 Civic Center Blvd, Philadelphia, PA 19104

23  
24 Author email addresses:

25  
26 [Brigid.poling@duke.edu](mailto:Brigid.poling@duke.edu)

27  
28 [price.alexander.m@gmail.com](mailto:price.alexander.m@gmail.com)

29  
30 [micah.luftig@duke.edu](mailto:micah.luftig@duke.edu)

31  
32 [Bryan.cullen@duke.edu](mailto:Bryan.cullen@duke.edu)

33  
34  
35 Virus Replication/Gene Expression

36  
37 Keywords:

38  
39 Epstein-Barr Virus

40  
41 miR-BHRF1 microRNAs

42  
43 Drosha

44  
45 EBNA-LP  
46  
47  
48  
49  
50  
51  
52  
53  
54  
55  
56  
57  
58  
59  
60  
61  
62  
63  
64  
65

1  
2  
3  
4 **Abstract**  
5

6 The Epstein-Barr virus (EBV) miR-BHRF1 microRNA (miRNA) cluster has been shown to  
7 facilitate B-cell transformation and promote the rapid growth of the resultant lymphoblastoid cell  
8 lines (LCLs). However, we find that expression of physiological levels of the miR-BHRF1 miRNAs  
9 in LCLs transformed with a miR-BHRF1 null mutant ( $\Delta 123$ ) fails to increase their growth rate. We  
10 demonstrate that the pri-miR-BHRF1-2 and 1-3 stem-loops are present in the 3'UTR of transcripts  
11 encoding EBNA-LP and that excision of pre-miR-BHRF1-2 and 1-3 by Drosha destabilizes these  
12 mRNAs and reduces expression of the encoded protein. Therefore, mutational inactivation of pri-  
13 miR-BHRF1-2 and 1-3 in the  $\Delta 123$  mutant upregulates the expression of not only EBNA-LP but  
14 also EBNA-LP-regulated mRNAs and proteins, including LMP1. We hypothesize that this  
15 overexpression causes the reduced transformation capacity of the  $\Delta 123$  EBV mutant. Thus, in  
16 addition to regulating cellular mRNAs in *trans*, miR-BHRF1-2 and 1-3 also regulate EBNA-LP  
17 mRNA expression in *cis*.  
18  
19  
20  
21  
22  
23  
24  
25  
26  
27  
28  
29  
30  
31  
32  
33  
34  
35  
36  
37  
38  
39  
40  
41  
42  
43  
44  
45  
46  
47  
48  
49  
50  
51  
52  
53  
54  
55  
56  
57  
58  
59  
60  
61  
62  
63  
64  
65

## Introduction

Epstein Barr Virus (EBV) is a double-stranded DNA virus of the  $\gamma$ -herpes subfamily that infects >90% of the global population. EBV is the causative agent of various malignancies including diffuse large B cell lymphoma (DLBCL), Burkitt lymphoma, post-transplant lymphoproliferative disorder (PTLD) and nasopharyngeal carcinoma. Additionally, EBV infection of naïve young adults results in infectious mononucleosis. During primary infection, EBV infects resting B cells and establishes a latency stage III infection, which is associated with DLBCL and PTLD. During latency III, EBV-infected B cells express the full repertoire of latency proteins (EBNA-LP, EBNA1, 2, 3A, 3B, 3C, LMP1 and 2A/B) as well as non-coding RNAs, including the EBV-encoded small RNAs (EBERs) and several microRNAs (miRNAs). In the laboratory, EBV latency III can be modeled by infection of primary human B cells to generate lymphoblastoid cell lines (LCLs) (Rickinson and Kieff, 2007).

EBNA-LP and EBNA2 are the first viral proteins expressed after B cell infection, through activation of the W promoter (Wp) by B cell specific transcription factors (Bell et al., 1998; Kirby et al., 2000; Tierney et al., 2000). EBNA2 and EBNA-LP then activate the Cp promoter, to drive expression of EBNA-LP, EBNA-1, 2, 3A, 3B and 3C, as well as the LMP1 promoter (LMP1p) (Harada and Kieff, 1997; Nitsche et al., 1997; Peng et al., 2005; Sung et al., 1991; Woisetschlaeger et al., 1990). Because the viral mRNAs encoding the EBNA proteins are all transcribed from the same promoters, alternative splicing is critical for their appropriate expression. EBNA-LP is the first open reading frame (ORF) after both the Cp and Wp promoters and EBNA-LP expression is dependent on a complex pattern of alternative splicing. First, EBNA-LP mRNAs require splicing from the first exon of the Wp transcripts (W0) early after infection, or the second exon of the Cp transcripts (C2) late in infection, to provide the initial AT dinucleotide in the ATG codon that initiates EBNA-LP translation. Second, EBNA-LP mRNAs must splice internally into the W1 exon, at the W1' 3' splice site, to incorporate the G in the ATG. EBNA-LP mRNAs then continue splicing to integrate multiple copies of the W1/W2 exon repeats in frame,

1  
2  
3  
4 which results in EBNA-LP proteins with a range of different molecular weights. The B95-8 strain  
5  
6 of EBV encodes 11 W1/W2 repeats and it was previously shown that incorporation of a minimum  
7  
8 of five repeats is necessary for full EBNA-LP function (Tierney et al., 2011). EBNA-LP mRNAs  
9  
10 then splice from the terminal W2 exon to the Y1 and Y2 exons, where the translational stop codon  
11  
12 for EBNA-LP is located in the Y2 exon. Y2 can then be spliced to several different 3' exons,  
13  
14 including those that encode EBNA1, 2, 3A, 3B, or 3C. If the ATG initiation codon for EBNA-LP is  
15  
16 not generated by appropriate splicing at the 5' end of these viral transcripts, then a long 5'UTR  
17  
18 for the mRNAs encoding the 3' EBNA1, 2, 3A, 3B, or 3C open reading frames (ORF) is generated  
19  
20 instead (Rogers et al., 1990).  
21  
22  
23

24 In addition to proteins, EBV encodes two miRNA clusters named for their location in the  
25  
26 EBV genome. The BamH1 fragment H rightward facing 1 (BHRF1) miRNA cluster consists of  
27  
28 three pri-miRNA stem-loops, generating the four mature miR-BHRF1-1, 1-2, 1-2\*, and 1-3  
29  
30 miRNAs (miR-BHRF1-2 gives rise to almost equal levels of two miRNAs derived from each arm  
31  
32 of the pre-miRNA intermediate). The miR-BHRF1-1 miRNA is located in the promoter for the late  
33  
34 BHRF1 mRNA while miR-BHRF1-2 and 1-3 are located in the BHRF1 mRNA 3' UTR. Additionally,  
35  
36 the BamH1 fragment A rightward transcript (miR-BART) miRNA cluster is composed of 22 pri-  
37  
38 miRNAs expressed from the various BART transcripts (Cai et al., 2006; Grundhoff et al., 2006;  
39  
40 Pfeffer, 2004; Zhu et al., 2009). The miR-BHRF1 miRNAs are only expressed during latency III  
41  
42 while the miR-BART miRNAs are expressed during all stages of latency, though at reduced levels  
43  
44 in latency III (Cai et al., 2006; Zhu et al., 2009).  
45  
46  
47

48 While the EBV-encoded miRNAs were discovered over a decade ago, and  
49  
50 photoactivatable ribonucleoside-enhanced crosslinking and immunoprecipitation (PAR-CLIP) has  
51  
52 allowed for the identification of many of their mRNA target sites (Riley et al., 2012; Skalsky et al.,  
53  
54 2012), elucidating their role during EBV-infection has remained challenging. So far, EBV-encoded  
55  
56 miRNAs have been shown to play a role in immune evasion (Albanese et al., 2016; Tagawa et  
57  
58 al., 2016; Xia et al., 2008), apoptosis (Kang et al., 2015; Lei et al., 2013), and inhibition of tumor  
59  
60  
61  
62  
63  
64  
65

1  
2  
3  
4 suppressors (Bernhardt et al., 2016). Additionally, inactivation of the miR-BHRF1 miRNA cluster  
5  
6 results in a reproducible and robust reduction in B cell transformation and LCL growth (Feederle  
7  
8 et al., 2011a, 2011b; Haar et al., 2015; Seto et al., 2010), which suggested that the miR-BHRF1  
9  
10 miRNA cluster was promoting EBV transformation by downregulating the expression in *trans* of  
11  
12 cellular mRNAs that inhibit this process. We tested this hypothesis by ectopically expressing the  
13  
14 miR-BHRF1 miRNAs in LCLs generated using a previously described EBV mutant that lacks all  
15  
16 these viral miRNAs ( $\Delta$ 123 LCLs). However, we were unable to rescue the slow growth rate of  
17  
18  $\Delta$ 123 LCLs, when compared to WT LCLs, even when all the miR-BHRF1 miRNAs were  
19  
20 simultaneously expressed at or above physiological levels. Furthermore, we observed that the  
21  
22  $\Delta$ 123 LCLs expressed a greatly increased level of the EBV transcription factor EBNA-LP when  
23  
24 compared to WT LCLs derived from the same donor. Here, we present evidence in favor of the  
25  
26 alternative hypothesis that the miR-BHRF1 miRNAs are in fact acting in *cis* to downregulate the  
27  
28 expression of EBNA-LP to a level optimum for B cell transformation by inducing the cleavage of  
29  
30 EBNA-LP mRNAs during miRNA excision.  
31  
32  
33  
34

## 35 **Results**

### 36 **Trans-complementation does not rescue the growth of LCLs lacking the miR-BHRF1** 37 **microRNAs**

38  
39  
40  
41  
42 Previous studies implicated the miR-BHRF1 miRNAs in enhancing the transformation of  
43  
44 primary B cells into LCLs, as well as increasing their cell cycle progression, and this enhanced  
45  
46 growth rate was maintained in established LCLs (Feederle et al., 2011a, 2011b; Seto et al.,  
47  
48 2010). Our original goal was to identify the individual miR-BHRF1 miRNAs responsible for efficient  
49  
50 growth of wildtype (WT) LCLs and we therefore first confirmed the slow growth phenotype of  $\Delta$ 123  
51  
52 LCLs. As shown in Fig. 1A, we indeed observed that WT LCLs grow approximately twice as fast  
53  
54 as  $\Delta$ 123 LCLs derived from the same blood donor.  
55  
56  
57

58 We next wanted to establish that the miR-BHRF1 miRNAs were indeed necessary and  
59  
60 sufficient to rescue the slow growth phenotype of  $\Delta$ 123 LCLs by ectopic expression of the entire  
61  
62  
63  
64  
65

1  
2  
3  
4 repertoire of miR-BHRF1 miRNAs. To this end, the miR-BHRF1-1, 1-2 and 1-3 pri-miRNAs were  
5  
6 cloned into the antisense-oriented intron present in the Tet-inducible lentiviral miRNA expression  
7  
8 vector pTREX, as this vector allows a consistently higher level of pri-miRNA expression when  
9  
10 compared to conventional lentiviral vectors (Fig.1B) (Poling et al., 2017). miR-BHRF1-1 and 1-3  
11  
12 are not well expressed from their natural pri-miRNA stem-loops, isolated from the EBV genome  
13  
14 (Feederle et al., 2011a; Haar et al., 2015), so they were expressed from expression cassettes  
15  
16 based on the human pri-miR-30 precursor, as previously described (Zeng et al., 2002).  
17  
18 Additionally, miR-BHRF1-2/2\* was cloned into pTREX using its natural stem-loop and flanking  
19  
20 sequences. After selection of transduced cells by puromycin selection, and induction of miRNA  
21  
22 expression by addition of doxycycline (Dox), we observed levels of expression of miR-BHRF1-1,  
23  
24 1-2, 1-2\* and 1-3 in  $\Delta 123$  LCLs that were similar to the expression levels observed in WT LCLs  
25  
26 (Fig. 1C). Since miRNAs are thought to regulate mRNA expression in *trans* (Chong et al., 2010;  
27  
28 Guo et al., 2010; Zeng et al., 2002), we hypothesized that ectopic expression of the miR-BHRF1  
29  
30 miRNAs in  $\Delta 123$  LCLs would increase the growth of these mutant LCLs to WT levels. However,  
31  
32 we did not observe any rescue of the slow growth phenotype ( $p < 0.05$ ) (Fig. 1D). This suggested  
33  
34 that the miR-BHRF1 miRNAs do not enhance LCL growth via their canonical role of mRNA  
35  
36 downregulation in *trans* by translational inhibition or degradation of targeted mRNAs  
37  
38 (Chendrimada et al., 2005; Huntzinger and Izaurralde, 2011; Liu et al., 2004; Meister et al., 2004).  
39  
40  
41  
42  
43

#### 44 **The EBNA-LP protein and co-transcriptional activity are upregulated in $\Delta 123$ LCLs**

45  
46 Because the slower growth of the  $\Delta 123$  LCLs was not rescued by expression of the EBV  
47  
48 miR-BHRF1 miRNAs in *trans*, we sought an alternative hypothesis to explain this phenotype.  
49  
50 Previously, we reported that  $\Delta 123$  LCLs display a marked upregulation in the expression of the  
51  
52 EBNA-LP protein (Feederle et al., 2011a, 2011b) and we confirmed that EBNA-LP levels in  $\Delta 123$   
53  
54 LCLs are indeed between 5- and 20-fold higher than seen in control WT LCLs (Fig. 2). This latter  
55  
56 result cannot be explained based on the model that the miR-BHRF1 miRNAs are acting to  
57  
58 downregulate EBNA-LP mRNA expression in *trans*, as there are no predicted target sites for these  
59  
60  
61

1  
2  
3  
4 viral miRNAs in the EBNA-LP mRNAs, and moreover we and others failed to detect the binding  
5  
6 of miR-BHRF1 miRNAs to EBNA-LP mRNAs, or the viral HF exon, using high throughput CLIP  
7  
8 techniques (Riley et al., 2012; Skalsky et al., 2012).  
9

10  
11 To determine if the increased expression of the EBNA-LP protein correlated with an  
12  
13 upregulation of the Cp and LMP1 promoters, which are transcriptionally activated by EBNA-LP  
14  
15 and EBNA2 (Harada and Kieff, 1997; Nitsche et al., 1997; Peng et al., 2005; Sung et al., 1991;  
16  
17 Wang et al., 1990; Woisetschlaeger et al., 1990), we used 4-thiouridine (4SU) to label nascent  
18  
19 transcripts for 60 min. Nascent transcripts were purified and their expression levels were then  
20  
21 compared to total transcript levels to determine half-life, nascent transcript expression, and total  
22  
23 transcript expression (Fig. 3A-C). As expected, we saw a significant increase in the level of  
24  
25 nascent and total Cp driven and LMP1 transcripts in the  $\Delta 123$  LCLs, when compared to control  
26  
27 mRNAs encoding GAPDH,  $\beta$ -Actin, and SETDB1 (Fig. 3A and B), indicating that overexpression  
28  
29 of EBNA-LP leads to a specific increase in EBNA-LP-mediated transcriptional activation of these  
30  
31 viral mRNAs. In contrast, we did not see any major change in viral mRNA half-life when WT LCLs  
32  
33 were compared to  $\Delta 123$  LCLs (Fig. 3C). In addition to the upregulation of EBNA-LP regulated  
34  
35 transcripts, we also saw a significant increase in both total and nascent Wp driven transcripts for  
36  
37 some of our donors, which corroborates published findings (Feederle et al., 2011a, 2011b).  
38  
39  
40  
41

42 In addition to an increase in EBNA-LP regulated viral transcripts, the encoded viral  
43  
44 proteins were also upregulated in  $\Delta 123$  LCLs. Thus, we saw an upregulation of LMP1 expression  
45  
46 in all six donors tested and upregulation of EBNA2 in six out of eight donors tested (Fig. 3D and  
47  
48 3E). The EBNA2 exon (YH) is one of many exons that can be alternatively spliced in Cp and Wp-  
49  
50 driven pre-mRNAs; however, during the establishment of latency, the Cp promoter, due to  
51  
52 activation from EBNA2 and EBNA-LP, becomes the dominant source of EBV transcription  
53  
54 (Harada and Kieff, 1997; Sung et al., 1991; Woisetschlaeger et al., 1990). The two donors without  
55  
56 an upregulation of EBNA2 may alternatively splice to non-YH containing exons at an increased  
57  
58 level, and not to YH itself, leading to a basal expression level of EBNA2. Nevertheless, EBNA2 is  
59  
60  
61  
62  
63  
64  
65



1  
2  
3  
4 upregulated in the  $\Delta 123$  LCLs derived from 75% of the donors tested (Fig. 3E), which is  
5  
6 statistically significant ( $p < 0.01$ ).  
7

### 8 **The miR-BHRF1 microRNAs downregulate EBNA-LP expression in *cis***

9

10 We next sought to determine how disruption of miR-BHRF1 miRNA expression induces  
11 overexpression of EBNA-LP. Early reports indicated that the HF exon, which encompasses the  
12 miR-BHRF1-2 and miR-BHRF1-3 pri-miRNAs, forms the 3'UTR of a minor portion of EBNA-LP  
13 mRNAs (Austin et al., 1988; Bodescot and Perricaudet, 1986; Pfitzner et al., 1987). However, the  
14 question of whether these pri-miRNAs affect EBNA-LP mRNA expression in *cis* has not been  
15 previously addressed. We therefore sought to determine if the BHRF1 miRNAs are indeed  
16 encoded within the 3'UTR of EBNA-LP mRNAs, and if so, how often this occurred. In this context,  
17 we were particularly interested in a previous report (Lin and Sullivan, 2011) demonstrating that  
18 the human  $\gamma$ -herpes KSHV uses viral pri-miRNAs to downregulate expression of the viral Kaposin  
19 B mRNA and protein in *cis*.  
20  
21  
22  
23  
24  
25  
26  
27  
28  
29  
30  
31  
32

33 The miR-BHRF1 miRNAs are encoded within two exons. The more 5' exon (H2) contains  
34 the miR-BHRF1-1 pri-miRNA while the more 3' exon (HF) contains the BHRF1 protein coding  
35 sequence and the miR-BHRF1-2 and 1-3 pri-miRNAs in the BHRF mRNA 3'UTR (Fig. 4A). To  
36 determine if the H2 or HF exons form part of the 3'UTR of EBNA-LP transcripts, we performed a  
37 meta-analysis of RNA-Seq data from 10 random donors from the 1000 genomes project (Fig. 4B)  
38 (Lappalainen et al., 2013). Reads that failed to align to the human genome were aligned to the  
39 WT EBV genome (Accession: NC\_007605) using the hierarchical indexing for spliced alignment  
40 of transcripts (HISAT2) splice-aware RNA-Seq alignment software (Kim et al., 2016). Splice  
41 junctions were identified and quantified by visualizing data in the integrative genome viewer (IGV)  
42 (Robinson et al., 2011). These alignments revealed no splice junctions from any Cp or Wp-driven  
43 exon located 5' of H2 to the H2 exon. This suggests that miR-BHRF1-1 is not encoded within any  
44 of the mature transcripts driven from the Cp and Wp promoters and thus cannot form part of the  
45 EBNA-LP mRNA 3'UTR. Instead, and as previously proposed, miR-BHRF1-1 is likely excised  
46  
47  
48  
49  
50  
51  
52  
53  
54  
55  
56  
57  
58  
59  
60  
61  
62  
63  
64  
65

1  
2  
3  
4 from an intronic location (Cai et al., 2006; Xing and Kieff, 2007). In contrast, our data do provide  
5  
6 strong evidence in support of the hypothesis that both the Y2 exon and, to a lesser extent the Y3  
7  
8 exon, is frequently spliced to the HF exon (Fig. 4B). In particular, Y2-HF splice junction read depth  
9  
10 was comparable to those of canonical EBV splice junctions, such as Y2 to U and Y3 to U (Fig.  
11  
12 4B). These data suggest that the BHRF1 ORF, and the miR-BHRF1-2 and 1-3 pri-miRNA stem-  
13  
14 loops, likely constitute a high percentage of the 3'UTRs of EBNA-LP mRNAs. However, because  
15  
16 of the differential use of the alternative splice acceptors W1 and W1', where W1' is necessary to  
17  
18 generate the ATG translation initiation codon for EBNA-LP expression, it remained unclear if any  
19  
20 functional EBNA-LP mRNAs indeed contain the EBNA-LP ORF located 5' to the HF exon (Fig.  
21  
22 4A).  
23  
24

25  
26 Since EBNA-LP-encoding transcripts that terminate at the HF exon can only be identified  
27  
28 in long sequencing reads that encompass not only the HF exon but also the 5' end of the EBNA-  
29  
30 LP ORF, we performed PacBio sequencing for EBV transcripts expressed in WT EBV strain  
31  
32 B95.8-derived LCLs. Total RNA was harvested and EBV specific transcripts were enriched using  
33  
34 a biotinylated antisense oligonucleotide specific for the W2 exon common to all EBNA transcripts  
35  
36 followed by pull-down using streptavidin beads (Fig. 4A). This enriched pool of EBV transcripts  
37  
38 was then oligo-dT primed to generate long cDNAs that were sequenced using a PacBio RSII  
39  
40 analyzer. We were able to enrich the Wp/Cp driven EBV transcripts by ~7,000-fold over PacBio  
41  
42 sequencing previously published from total LCL mRNA (O'Grady et al., 2016; Tilgner et al., 2014).  
43  
44 EBV transcripts make up a low percentage of total LCL transcripts, as seen in our RNA-Seq meta-  
45  
46 analysis (EBV transcripts were only ~0.70% of total reads). Therefore, despite our 7,000-fold  
47  
48 enrichment, we identified 120 reads that mapped to EBV, 95 reads that mapped to the Wp/Cp  
49  
50 transcript region, 29 reads that contain the HF exon, and 5 reads that encode EBNA-LP (Fig. 4C).  
51  
52 However, these data do indicate that the HF exon is present in a high proportion of all Wp/Cp-  
53  
54 driven transcripts (44%), and, more importantly, in EBNA-LP-encoding transcripts (40%). This  
55  
56  
57  
58  
59  
60  
61  
62  
63  
64  
65

1  
2  
3  
4 indicates that excision of the pri-miR-BHRF1 miRNAs located in the HF exon has the potential to  
5  
6 significantly reduce EBNA-LP transcript levels, and hence EBNA-LP expression.  
7

8  
9 Cleavage of a pri-miRNA stem-loop by the microprocessor complex, consisting of Drosha  
10 and DGCR8, results in excision of the pre-miRNA and degradation of the 5' and 3' pre-miRNA  
11 flanking regions (Cai et al., 2004). Therefore, the excision of pre-miR-BHRF1-2 and 1-3 is  
12 predicted to reduce EBNA-LP protein expression. To test this hypothesis, we cloned the 3'UTR  
13 of the BHRF1 protein, which encompasses these two pri-miRNAs, either from WT EBV B95-8 or  
14 from the  $\Delta 123$  EBV mutant in which the pri-miR-BHRF1-2 and 1-3 stem-loops have been  
15 mutationally inactivated, 3' to the FLuc indicator gene. These two constructs, and a control  
16 "empty" FLuc vector lacking any inserted EBV sequences, were then transfected into wildtype  
17 293T cells, as well as into a previously described 293T derivative in which both Drosha and Dicer  
18 expression had been blocked by gene editing, called RNaseIII<sup>-/-</sup> cells (Aguado et al., 2017). FLuc  
19 expression was then determined relative to a co-transfected NanoLuc control vector. The ratio of  
20 the FLuc expression seen with the empty FLuc vector in WT 293T cells versus the RNaseIII<sup>-/-</sup>  
21 cells was then set at 1.0. As shown in Fig. 5A, we see a significant ~4-fold reduction of FLuc  
22 activity in the WT 293T cells, relative to the RNaseIII<sup>-/-</sup> cells, when pri-miR-BHRF1-2 and 1-3  
23 were present in the 3'UTR, and this inhibition was fully rescued when the two pri-miRNAs stem-  
24 loops were mutated ( $p < 0.01$ ). We also confirmed the efficient excision of pre-miR-BHRF1-2 and  
25 1-3 from the FLuc-based reporter construct by visualizing the expression of the resulting miR-  
26 BHRF1-2, 1-2\* and 1-3 miRNAs by Northern blot analysis (Fig. 5B).  
27  
28  
29  
30  
31  
32  
33  
34  
35  
36  
37  
38  
39  
40  
41  
42  
43  
44  
45  
46  
47

48  
49 To further confirm the presence of the HF exon in a least a subset of EBNA-LP mRNAs,  
50 we generated 12 artificial miRNAs (amiRNAs) that were designed to target the HF exon and  
51 identified two amiRNAs, called B4 and B11, that cleaved the HF exon effectively.  $\Delta 123$  LCLs were  
52 then transduced with a pTREX-based lentivector expressing either B4 or B11 and a Western blot  
53 analysis for EBNA-LP expression performed on puromycin selected, Dox-induced cells. We  
54 indeed saw a reduction of EBNA-LP protein expression when either HF targeting amiRNAs was  
55  
56  
57  
58  
59  
60  
61  
62  
63  
64  
65

1  
2  
3  
4 expressed (Fig. 6). The observed reduction in EBNA-LP protein when the HF exon was targeted  
5  
6 by RNAi confirms that at least some EBNA-LP mRNAs contain HF and suggest that  
7  
8 destabilization of these EBNA-LP transcripts by excision of the pri-miR-BHRF1-2 and 1-3 is  
9  
10 indeed likely to occur.  
11

### 12 **PacBio sequencing reveals additional novel Wp/Cp splice patterns**

13  
14  
15 PacBio sequencing is a powerful tool for elucidating novel transcription patterns due to its  
16  
17 ability to sequence full-length mRNAs. By performing PacBio sequencing on EBV transcripts, we  
18  
19 identified two novel EBV RNA splicing patterns. First, we observed a new 3' splice site within the  
20  
21 C2 exon, which we term C2', that was observed in 35% of sequenced transcripts containing C2  
22  
23 (Fig. 7A and 7B). This splice donor, when used, excludes the final seven base pairs of the C2  
24  
25 exon. This is especially relevant to the EBNA-LP ORF, since it eliminates the AT dinucleotide  
26  
27 necessary for EBNA-LP translation initiation. Since the C2' 3' splice site was used 35% of the  
28  
29 time, this novel splice junction contributes to the low level of Cp/Wp transcripts capable of  
30  
31 encoding EBNA-LP (8%) (Fig. 4C and Fig. 7B). We looked for the C2' splice junction in our meta-  
32  
33 analysis of the 1000 genomes RNA-Seq data (Lappalainen et al., 2013) and observed that the  
34  
35 C2' splice site is used 27% of the time, validating our PacBio sequencing data. We also observed  
36  
37 splicing from the 5' splice site at the end of the W2 exon to a W1' 3' splice site. This W2-W1'  
38  
39 splicing event occurs five base pairs internal to W1, resulting in a frame shift in the EBNA-LP ORF  
40  
41 and causing a premature stop codon to occur, thereby inhibiting the expression of EBNA-LP.  
42  
43 Since this internal W1' splicing event occurs 48% of the time, it would cause significantly reduced  
44  
45 EBNA-LP expression. Combined, these two novel splicing events prevent the expression of  
46  
47 EBNA-LP by a significant number of Cp/Wp initiated transcripts.  
48  
49  
50  
51  
52

53  
54 The third novel EBV splicing pattern we observed in this study resulted from shallow RNA  
55  
56 sequencing of the  $\Delta 123$  LCLs. With the goal of establishing that EBNA-LP coding transcripts  
57  
58 terminate in the HF exon, we performed shallow sequencing on both WT and  $\Delta 123$  LCLs. In doing  
59  
60 so, we noticed splicing from the Y2 exon to two closely adjacent 3' splice sites internal to the HF  
61  
62  
63  
64  
65

1  
2  
3  
4 exon, specifically within the mature miR-BHRF1-2\* sequence. The deletion mutation introduced  
5  
6 into the  $\Delta 123$  EBV mutant removed the 3' arm of the pri-miR-BHRF2 stem-loop while leaving the  
7  
8 5' arm, including the mature miR-BHRF2\* sequence, intact. Even though the miR-BHRF1-2\*  
9  
10 sequence is, of course, present in WT EBV strain B95-8, we did not detect this splicing event in  
11  
12 either our shallow sequencing or PacBio sequencing of WT LCL transcripts. We hypothesize that  
13  
14 this is because these two novel 3' splice sites are not normally available for splicing due to their  
15  
16 sequestration within the pri-miR-BHRF1-2 stem-loop in LCLs generated using WT EBV. Whether  
17  
18 this novel splicing event has any effect on EBV gene expression during either the latent or lytic  
19  
20 phase of the viral replication cycle is unclear, though it clearly has the potential to inhibit BHRF1  
21  
22 protein expression.  
23  
24  
25

## 26 Discussion

27  
28 Previous studies by our laboratory and others demonstrated that the elimination of the  
29  
30 miR-BHRF1 miRNAs in the  $\Delta 123$  EBV mutant inhibited B cell transformation and reduced the  
31  
32 growth rate of the subsequent  $\Delta 123$  LCL cell lines (Feederle et al., 2011a, 2011b; Haar et al.,  
33  
34 2015; Seto et al., 2010). In this study, we show that ectopic expression of physiological levels of  
35  
36 the miR-BHRF1 miRNAs does not restore rapid growth to  $\Delta 123$  LCLs (Fig. 1C). To explain this  
37  
38 result, we propose a model whereby excision of pre-miR-BHRF1-2 and 1-3 from the EBNA-LP  
39  
40 mRNA 3'UTR by the microprocessor complex is important for expression of the appropriate level  
41  
42 of EBNA-LP, and hence of EBNA-LP regulated proteins (Fig. 8).  
43  
44  
45

46  
47 While it is clear that the BHRF1 miRNAs play a role in B cell transformation and growth,  
48  
49 their mechanism of action has remained unclear. However, given that the canonical mechanism  
50  
51 of action of miRNAs is to repress mRNA function in *trans*, and given that mRNA targets bound by  
52  
53 the miR-BHRF1 miRNAs can be readily identified by high throughput CLIP approaches (Riley et  
54  
55 al., 2012; Skalsky et al., 2012), it seemed likely that these miRNAs were acting to repress the  
56  
57 expression of cellular factors that inhibit B cell transformation. By studying the individual roles of  
58  
59 BHRF1 miRNAs in growth and transformation, previous research has revealed that a mutant EBV  
60  
61

1  
2  
3  
4 lacking only miR-BHRF1-1 is fully competent for LCL transformation (Feederle et al., 2011a).  
5  
6 Moreover, mutation of the BHRF1-2 and 1-2\* seed sequences, while leaving the structure of the  
7  
8 pri-miR-BHRF2 stem-loop intact, also revealed no difference in B cell transformation efficiency,  
9  
10 and LCL cell cycle progression, despite the fact that a mutant EBV virus in which the pri-miR-  
11  
12 BHRF1-2 stem-loop was deleted demonstrated markedly reduced transformation efficiency  
13  
14 (Feederle et al., 2011a; Haar et al., 2015). The Delecluse laboratory has also shown that pri-miR-  
15  
16 BHRF1-2 processing is necessary for efficient processing and expression of pri-miR-BHRF1-3  
17  
18 and they therefore proposed, essentially by a process of elimination, that loss of miR-BHRF1-3  
19  
20 expression is solely responsible for the decrease in B cell transformation and LCL growth seen  
21  
22 with the  $\Delta 123$  EBV mutant (Haar et al., 2015). This was surprising as the seed sequence of miR-  
23  
24 BHRF1-3, unlike the seed sequence of miR-BHRF1-2, is not conserved in primate  
25  
26 lymphocryptovirus (LCV) evolution (Cai et al., 2006; Riley et al., 2010; Skalsky et al., 2014).  
27  
28 However, we show here that ectopic expression of all of the miR-BHRF1 miRNAs, including miR-  
29  
30 BHRF1-3, in  $\Delta 123$  LCLs fails to restore the rapid growth seen with WT LCLs (Fig. 1D). The  
31  
32 apparent requirement for the pri-miR-BHRF1 stem-loops, but not their activity as miRNAs, for  
33  
34 optimal LCL growth suggested the alternative hypothesis that the EBV pri-miR-BHRF1 stem-loops  
35  
36 promote B cell transformation and LCL growth by acting in *cis* to promote the expression of an  
37  
38 optimal level of the EBNA-LP transcription factor and, hence, of its downstream gene targets.  
39  
40  
41  
42  
43

44 As previously reported, we indeed observe a marked increase in EBNA-LP protein  
45  
46 expression in  $\Delta 123$  LCLs, relative to WT LCLs (Fig. 2) (Feederle et al., 2011a, 2011b). As would  
47  
48 be predicted, we also saw an increase in the expression of EBNA-LP regulated viral transcripts  
49  
50 and proteins, specifically Cp and LMP1p-driven transcripts and the EBNA2 and LMP1 proteins  
51  
52 (Fig. 3). CLIP analysis has revealed no target sites for the miR-BHRF1 miRNAs in Cp or Wp-  
53  
54 driven transcripts, suggesting that the miR-BHRF1 miRNAs do not directly inhibit Cp/Wp transcript  
55  
56 expression (Riley et al., 2012; Skalsky et al., 2012). Early reports identified rare Cp/Wp transcripts  
57  
58 with splicing from the Y exons to the HF exon (Austin et al., 1988; Bodescot and Perricaudet,  
59  
60  
61  
62  
63  
64  
65

1  
2  
3  
4 1986; Pfitzner et al., 1987) and we therefore hypothesized that the miR-BHRF1 pri-miRNAs might  
5  
6 be located in the EBNA-LP 3'UTR. This would be expected to result in an inhibition of EBNA-LP  
7  
8 mRNA expression in *cis*, due to destabilization resulting from the excision of the pre-miRNAs by  
9  
10 microprocessor cleavage, and thus provided an attractive alternative explanation for the apparent  
11  
12 inverse correlation between EBNA-LP and miR-BHRF1 miRNA expression. Previous research  
13  
14 provides evidence that splicing of Cp/Wp transcripts to the HF exon does indeed occur. Thus,  
15  
16 Arvey et. al. showed by RNA-Seq that splicing from the Y2 exon to HF occurred in 35% of all  
17  
18 Cp/Wp driven transcripts (Arvey et al., 2012), while Tierney et al. showed by qRT-PCR that Y2-  
19  
20 HF transcripts are highly expressed in LCLs (Tierney et al., 2015). However, due to the technical  
21  
22 limitations of RNA-Seq and qRT-PCR, these studies could not confirm that the viral sequences  
23  
24 located 5' to the HF exon indeed encoded EBNA-LP rather than a long 5'UTR on a BHRF1 mRNA,  
25  
26 for example. Our study expands on this previous work by looking at long EBV sequence reads  
27  
28 generated by PacBio sequencing. From this, we determined that ~44% of our Cp/Wp transcripts  
29  
30 contain the HF exon as their 3'UTR and ~40% of transcripts bearing an intact EBNA-LP ORF  
31  
32 terminate within the HF exon (Fig. 4C). Previous PacBio sequencing of LCLs did not include any  
33  
34 enrichment for Cp/Wp-driven transcripts, and so failed to detect any splicing between the Y exons  
35  
36 and the HF exon in latent transcripts (O'Grady et al., 2016). We have therefore identified a novel,  
37  
38 yet common, splicing pattern for EBNA-LP transcripts that allows the miR-BHRF1-2 and 1-3 pri-  
39  
40 miRNA stem-loops to downregulate EBNA-LP expression in *cis*. Importantly, we note that excision  
41  
42 of miR-BHRF1-2 and/or 1-3 from EBNA-LP mRNAs containing the HF exon would not only  
43  
44 destabilize these EBNA-LP mRNAs but also preclude the derivation of oligo-dT-primed cDNA  
45  
46 reads containing both the HF exon and the EBNA-LP ORF. Therefore, our sequencing data likely  
47  
48 greatly underestimate the percentage of EBNA-LP transcripts that contain the HF exon.  
49  
50  
51  
52  
53  
54

55 Supporting the role for pri-miR-BHRF1-2 and 1-3, but not pri-miR-BHRF1-1 in the *cis*  
56  
57 regulation of EBNA-LP expression, previously published data demonstrate an upregulation of  
58  
59 EBNA-LP expression in EBV with mutants individually lacking the pri-miR-BHRF1-2 or 1-3 stem-  
60  
61

1  
2  
3  
4 loop, but not with a mutant lacking only miR-BHRF1-1 (Feederle et al., 2011a). Additionally, the  
5  
6 upregulation of the EBNA-LP-activated promoter Cp was only observed with pri-miR-BHRF1-2  
7  
8 and 1-3 single mutants, indicating that it is the upregulation of EBNA-LP expression that induces  
9  
10 the observed increase in EBNA-LP-regulated transcription (Feederle et al., 2011a). We have used  
11  
12 reporter assays to demonstrate that the pri-miR-BHRF1 and 1-3 stem-loops are indeed able to  
13  
14 downregulate gene expression in *cis*, and we also demonstrate that this downregulation is, as  
15  
16 expected, Drosha dependent (Fig. 5A). Moreover, we also observed a reduction in EBNA-LP  
17  
18 protein expression when the HF exon was targeted using RNAi (Fig. 6). This demonstrates that  
19  
20 destabilization of the HF exon, by cleavage by either Drosha or the RNA-induced silencing  
21  
22 complex (RISC), both result in the inhibition of EBNA-LP expression.  
23  
24  
25

26  
27 While our data argue that the pri-miR-BHRF1-2 and 1-3 stem-loops are acting in *cis* to  
28  
29 ensure that the optimal level of EBNA-LP protein is expressed, this does not, of course, indicate  
30  
31 that the miR-BHRF1 miRNAs do not also regulate the expression of important cellular mRNAs in  
32  
33 *trans*. However, these data do argue that the remarkable reduction in transformation potential and  
34  
35 LCL growth rate seen with the  $\Delta 123$  EBV mutant is primarily due to the overexpression of EBNA-  
36  
37 LP, and/or its downstream viral gene targets, that is observed in the absence of these two viral  
38  
39 pri-miRNAs. Furthermore, we identified two novel splice junctions (C2' and W2-W1' splicing), both  
40  
41 of which would also reduce the expression of EBNA-LP. It therefore seems that EBV has evolved  
42  
43 multiple mechanisms to post-transcriptionally downregulate EBNA-LP expression, further  
44  
45 indicating that an optimal level of EBNA-LP expression is important for EBV pathogenesis.  
46  
47

48  
49 We note that we do not address whether downregulation of EBNA-LP expression by  
50  
51 RNAi, as shown in Fig. 6, increases the growth rate of the  $\Delta 123$  LCLs, as predicted by our model  
52  
53 (Fig. 8). This is because, even though we were able to stably express amiRNAs targeting the HF  
54  
55 exon of EBNA-LP transcripts in  $\Delta 123$  LCLs, and this did reduce EBNA-LP expression by 2-5 fold  
56  
57 (Fig. 6), we did not see a consistent increase in the growth rate of  $\Delta 123$  LCLs that was statistically  
58  
59  
60  
61  
62  
63  
64  
65



1  
2  
3  
4 significant. This may in part reflect the ability of EBNA-LP to transcriptionally activate its own  
5  
6 expression.

7  
8 We note that the location of the miR-BHRF1-2 and 1-3 pri-miRNAs 3' to both the BHRF1  
9  
10 and EBNA-LP ORF is evolutionarily conserved amongst primate lymphocryptoviruses (LCV) (Cai  
11  
12 et al., 2006; Riley et al., 2010; Skalsky et al., 2014; Walz et al., 2010). Additionally, the EBNA-LP  
13  
14 homologs in primate LCVs demonstrate identical functionality to EBV-encoded EBNA-LP (R Peng  
15  
16 et al., 2000; Rongsheng Peng et al., 2000). Although the BHRF1-2 and 1-2\* seed regions are  
17  
18 conserved with other primate LCVs, mutating their seed sequence does not affect B cell  
19  
20 transformation (Haar et al., 2015; Riley et al., 2010; Skalsky et al., 2014). Additionally, the seed  
21  
22 sequence for miR-BHRF1-3 is not evolutionarily conserved amongst primate LCVs (Cai et al.,  
23  
24 2006; Riley et al., 2010; Skalsky et al., 2014; Walz et al., 2010). Therefore, we hypothesize that  
25  
26 the regulation of the expression of EBNA-LP-like proteins by viral pri-miRNA stem-loops acting in  
27  
28 *cis* has been conserved across primate LCV evolution.

29  
30  
31  
32  
33 This research adds to a short list of mRNAs whose expression has been proposed to be  
34  
35 downregulated by Drosha processing of a pri-miRNA-like stem-loop located in *cis*. In humans,  
36  
37 transcripts encoding DGCR8, follistatin-like 1 (FSTL1), and the KSHV gene product Kaposin B  
38  
39 (KapB) mRNAs are currently the only identified mRNAs that are regulated in this manner (Han et  
40  
41 al., 2009; Lin and Sullivan, 2011; Sundaram et al., 2013). Indeed, a genome wide study of the  
42  
43 human genome only found DGCR8 mRNAs to be downregulated by Drosha cleavage (Shenoy  
44  
45 and Blelloch, 2009). However, there are at least two additional examples of mRNAs regulated by  
46  
47 pri-miRNA stem-loops located in *cis* in mice: the transcription factors neurogenin 2 and T-box  
48  
49 brain 1 (Chong et al., 2010; Knuckles et al., 2012; Marinaro et al., 2017). Interestingly, in most of  
50  
51 these cases, the resulting miRNA is not thought to be expressed at a high enough level to be  
52  
53 functional, unlike the KHSV and EBV miRNAs (Han et al., 2009; Knuckles et al., 2012; Marinaro  
54  
55 et al., 2017; Sundaram et al., 2013). It therefore appears possible that KHSV and EBV have  
56  
57  
58  
59  
60  
61  
62  
63  
64  
65

1  
2  
3  
4 independently evolved taken advantage of both the *cis* and *trans* regulatory capabilities of  
5  
6 miRNAs.

## 7 8 **Materials and Methods**

### 9 10 **Cell culture**

11  
12 LCLs were generated from peripheral blood mononuclear cells (PBMCs) using both the  
13  
14 WT and  $\Delta$ 123 EBV bacmids, as previously described (Feederle et al., 2011a, 2011b). LCLs and  
15  
16 the EBV-negative Burkitt lymphoma cell line BJAB were grown in Roswell Park Memorial Institute  
17  
18 (RPMI) 1640 medium supplemented with 10% fetal bovine serum (FBS), 50  $\mu$ g/ml gentamicin  
19  
20 (LifeTechnologies), and 1x Antibiotic-Antimycotic (Gibco, 15240062). 293T cells were grown in  
21  
22 Dulbecco's modified Eagle medium (DMEM) supplemented with 5% FBS, 50  $\mu$ g/ml gentamicin,  
23  
24 and 1x Antibiotic-Antimycotic. NoDice/ $\Delta$ PKR cells (Kennedy et al., 2015) and RNaseIII<sup>-/-</sup> 293T  
25  
26 cells (Aguado et al., 2017) were grown in DMEM supplemented with 10% FBS, 50  $\mu$ g/ml  
27  
28 gentamicin, and 1x Antibiotic-Antimycotic. 293 EBV bacmid producer cells were grown in RPMI  
29  
30 1640 medium supplemented with 10% FBS, 50  $\mu$ g/ml gentamicin, and 100  $\mu$ g/ml hygromycin B  
31  
32 (Corning). All cells were grown at 37°C with 5% CO<sub>2</sub>.

### 33 34 35 **Molecular clones**

36  
37 All miRNA and amiRNA expression vectors were generated by cloning into the pTREX vector  
38  
39 using the XhoI and EcoRI sites present within the intron upstream of the Thy1.1 protein (primers  
40  
41 1-3 in Supplementary Table 1) (Poling et al., 2017). The pTREX BHRF1-123 miRNA expression  
42  
43 vector was previously described (Poling et al., 2017). amiRNAs targeting the BHRF1 3'UTR, and  
44  
45 a control FLuc amiRNA, were generated in the pri-miR-30 context, as previously described (Zeng  
46  
47 et al., 2002), and then cloned into pTREX.

48  
49 The BHRF1 3'UTR from both the WT and  $\Delta$ 123 EBV bacmids was PCR cloned into the 3'UTR  
50  
51 of the pL-CMV-GL3 vector between the XhoI and NotI restriction sites (primers 4 and 5 in  
52  
53 Supplementary Table 1) (Skalsky et al., 2012). The NanoLuc cDNA used as an internal control  
54  
55  
56  
57  
58  
59  
60  
61  
62  
63  
64  
65

1  
2  
3  
4 was cloned in place of FLuc, between NheI and XhoI restriction sites, to generate pL-CMV-  
5  
6 NanoLuc (primers 6 and 7 in Supplementary Table 1) (Promega).  
7

### 8 9 **Lentiviral transduction and selection**

10 All lentiviral vectors were packaged in NoDice/ $\Delta$ PKR cells plated at  $5 \times 10^6$  cells per 15  
11 cm dish and transfected the next day with 11  $\mu$ g pCMV- $\Delta$ R8.74, 4.4  $\mu$ g pMD2.G, and 13.8  $\mu$ g  
12 pTREX. Plasmids along with 73  $\mu$ l polyethylenimine (PEI) were pre-mixed in 1 ml of OPTI-MEM  
13 (Gibco) then added to cells 15 min later. Cell culture media was changed the next day to RPMI  
14 supplemented with 10% FBS, 50  $\mu$ g/ml gentamicin, and 1x Antibiotic-Antimycotic. Three days  
15 post-transfection, culture media were passed through a 0.45  $\mu$ m filter and then used to transduce  
16 LCLs. Two days post-transduction, LCLs were treated with 0.2  $\mu$ g/ml puromycin (puro). Puro  
17 levels were slowly increased over time until cells grew well at a final concentration of 0.8  $\mu$ g/ml.  
18 LCLs were then induced with 1  $\mu$ g/ml doxycycline (Dox) and subjected to flow cytometry two days  
19 later to test for Thy1.1 positivity using an APC-conjugated CD90.1/Thy1.1 antibody (BioLegend).  
20 Fully selected cells were used for cell based assays.  
21  
22  
23  
24  
25  
26  
27  
28  
29  
30  
31  
32  
33  
34

35 Lentiviral packaging plasmids pCMV- $\Delta$ R8.74 and pMD2.G were gifts from Didier Trono,  
36 (Addgene plasmids #22036 & 12259). pCMV- $\Delta$ R8.74 expresses all HIV-1 proteins except for *env*,  
37 *vpr*, *vif*, *vpu*, and *nef*. pMD2.G expresses the VSV-G envelope glycoprotein.  
38  
39  
40  
41

### 42 **Growth curve**

43  
44 Percent Thy1.1+ for pTREX vectors was determined using an APC-conjugated  
45 CD90.1/Thy1.1 antibody (BioLegend). LCLs were plated at 250,000 cells/ml in T25 flasks in 5 ml  
46 of media using 25% filtered spent WT LCL media and 75% fresh RPMI supplemented with FBS,  
47 50  $\mu$ g/ml gentamicin, 1x Antibiotic-Antimycotic and 1  $\mu$ g/ml Dox, if transduced with pTREX. Cells  
48 were counted by flow cytometry on a FACSCanto II (BD) using AccuCount beads (Spherotech,  
49 Inc.) every 1-3 days and split back to 250,000 cells/ml. Cells transduced with pTREX were also  
50 tested for Thy1.1+. Cell counts were normalized to day 0 and then normalized to the WT LCL cell  
51 count. For pTREX transduced LCLs, only Thy1.1+ cells were considered for total cell counts.  
52  
53  
54  
55  
56  
57  
58  
59  
60  
61  
62  
63  
64  
65

## Stem-loop real-time PCR

miR-BHRF1 levels were determined by stem-loop real-time PCR as previously described (Chen et al., 2005; Feederle et al., 2011b; Poling et al., 2017). Briefly, total RNA was harvested from LCLs using TRIzol (LifeTechnologies) extraction following the manufacturer's protocol except that the last 70% ethanol wash was replaced with a re-precipitation. Reverse transcription (RT) was performed using the TaqMan miRNA reverse transcription kit (Applied Biosystems), 10 ng total RNA, and stem-loop miRNA specific primers (ThermoFisher Scientific, Inc.). qPCR was then performed using 10  $\mu$ l TaqMan universal PCR Master Mix No AmpErase UNG (Applied Biosystems), 4  $\mu$ l of a 1:3 dilution of the 15  $\mu$ l RT, 0.8  $\mu$ l TaqMan miRNA specific probe, and 5.2  $\mu$ l water on a StepOnePlus real-time PCR System (ThermoFisher Scientific, Inc.). U6 snRNA expression was analyzed alongside the miRNAs as an internal control. miRNA expression levels were normalized to WT expression, which was set to 1.

## Western blot

Cells were lysed in NP40 lysis buffer and sonicated. Protein amount was normalized using a Pierce BCA protein assay kit according to the manufacturer's protocol (ThermoFisher Scientific). Expression of EBNA-LP, EBNA2, and LMP1 were probed with antibodies JF186, PE2, and S12 respectively.  $\beta$ -Actin (Santa Cruz sc-47778) was probed as a loading control. Band intensity was determined using GeneTools image analysis software (Syngene).

To identify knockdown of EBNA-LP protein by amiRNAs directed against the HF exon,  $\Delta$ 123 LCLs were transduced with pTREX-based vectors expressing the Luc amiRNA and HF exon targeting amiRNAs B4 and B11. Once fully selected with puro, as determined by Thy1.1 expression using an APC-conjugated antibody (BioLegend) and flow cytometry, cells were removed from puro media and induced with Dox. Four days post-induction, cells were harvested for Western blot.

#### 4SU labeling

4-thiouridine (4SU) labeling was performed as previously described (Duffy et al., 2015). Briefly, 25 ml of LCLs were plated at 350,000 cells/ml. The next day, cells were treated with 200  $\mu$ M 4SU for 1 h. Cells were then collected and total RNA was harvested with TRIzol following the manufacturer's protocol except that the last 70% ethanol wash was replaced with an additional precipitation step. 50  $\mu$ g total RNA at 1  $\mu$ g/ $\mu$ l was combined with 5  $\mu$ g MTS-Biotin-XX (Biotium) in 100  $\mu$ l DMSO, 5  $\mu$ l 1M Tris (pH 7.4), 1  $\mu$ l 0.5 M EDTA, and 344  $\mu$ l water. Tubes were covered with aluminum foil and allowed to rotate at room temperature for 30 min. Excess biotin was then removed and the RNA re-precipitated and brought up in 50  $\mu$ l water. 10  $\mu$ l were removed to be used as total input RNA. 40  $\mu$ l MyOne Streptavidin C1 Dynabeads (ThermoFisher Scientific) were washed on a magnet three times with 0.1 M NaCl. Beads were resuspended in 40  $\mu$ l 2x streptavidin binding buffer (10 mM Tris pH 7.4, 1 mM EDTA, 2 N NaCl). Beads were added to the remaining 40  $\mu$ l RNA and allowed to rotate at room temperature for 30 min. Supernatant was then removed using a magnet and beads washed six times with wash buffer (100 mM Tris pH 7.4, 10 mM EDTA, 1 M NaCl). Nascent transcripts were then removed from the beads by 3x treatment with 100  $\mu$ l 100 mM dithiothreitol (DTT). Nascent RNA was then reprecipitated and resuspended in 20  $\mu$ l water. Nascent and total RNA were reverse transcribed using the High-Capacity cDNA Reverse transcription kit according to the manufacturer's protocol using 2  $\mu$ g total RNA and 2 out of the 20  $\mu$ l of nascent RNA (ThermoFisher Scientific). cDNA was diluted with 100  $\mu$ l to make 120  $\mu$ l total and 3  $\mu$ l was used per qPCR reaction. qPCR was performed with Power SYBR Green Master Mix (ThermoFisher Scientific) for WT and  $\Delta$ 123 total and nascent transcripts using the primers 11-20 in Supplementary Table 1. Half-life was calculated using the formula described by Dolken et al. (Dölken et al., 2008). Nascent transcription was determined by the  $\Delta\Delta$ Ct method normalizing all nascent transcript expression first to GAPDH and then normalizing  $\Delta$ 123 nascent expression to WT, which was set to 1. Total transcription levels were determined the same way except using total transcript expression levels.

## RNA-seq

Quality-controlled paired-end fastq files were pulled from ten random donors from the 1000 genomes project (Lappalainen et al., 2013). Reads were first aligned to the human genome (hg19) using HISAT2 (Kim et al., 2016). Unaligned reads were aligned to the WT EBV genome (Accession: NC\_007605). Data were visualized in IGV and splice junctions read depth was quantified (Robinson et al., 2011).

## PacBio sequencing

PacBio sequencing was performed by isolating Cp/Wp transcripts from total B95-8 LCL RNA using a W2 3'-biotinylated oligonucleotide (primer 21 in Supplementary Table 1). Briefly, 50  $\mu$ g total RNA was mixed with 250 pmol of the W2 probe. RNA and probe were heated to 95°C for 5 min and then allowed to slowly cool to room temperature. 20  $\mu$ l MyOne Streptavidin C1 Dynabeads (ThermoFisher Scientific) beads washed and resuspended in 2x streptavidin binding buffer as described above. RNA annealed to probe and beads were mixed and rotated at room temperature for 30 min. Beads were washed with wash buffer as described in section 3.5.8. Isolated transcripts were released from the beads by resuspending the beads in 100  $\mu$ l wash buffer, heating to 95°C for 5 min and immediately adding to a magnet and collecting the supernatant. Isolated transcripts were then reprecipitated and resuspended in 20  $\mu$ l water. Transcripts were then subject to an Iso-seq cDNA library preparation using the SMARTer PCR cDNA synthesis kit (Clontech) and size selected for 800 - 2 kb and 2 kb+ sized transcripts. SMRTbell adapters were then added to the isolated libraries and samples were sequenced on a PacBio RS II. Library preparation and sequencing was performed by the Duke sequencing and genomic technologies shared resource core. Sequence data were then aligned to the human genome (hg19) using GMAP (Wu and Watanabe, 2005). Unaligned sequences were then aligned to the B95-8 EBV genome (Accession: V01555).

## Luciferase assay and Northern blot

293T cells and RNaseIII<sup>-/-</sup> cells were plated at 1x10<sup>5</sup> cells per well in a 24-well plate for both luciferase assay and Northern blot. The next day cells were transfected with 1 ng pL-CMV-NanoLuc, 10 ng pL-CMV-GL3, pL-CMV-GL3 BHRF1-3'UTR, or pL-CMV-GL3 BHRF1-3'UTR  $\Delta$ 23, and 500 ng pcDNA3 as a filler along with 1.27  $\mu$ l polyethylenimine (PEI). Media was changed the next day and two days post-transfection cells were harvested with 1x passive lysis buffer (Promega). Firefly and NanoLuc expression was determined using the Nano-Glo dual-luciferase reporter assay system (Promega). Firefly expression was normalized to NanoLuc expression. pL-CMV-GL3 BHRF1-3'UTR and pL-CMV-GL3 BHRF1-3'UTR  $\Delta$ 23 relative expression levels were normalized to the pL-CMV-GL3 relative expression level. Last, the 293T transfected cells expression levels were normalized to the RNaseIII<sup>-/-</sup> expression levels.

Two days post-transduction total RNA was isolated by TRIzol extraction as described above. 10  $\mu$ g total RNA was run on a 15% TBE-Urea gel (BioRad). RNA was transferred onto nylon membrane (Perkin Elmer) which was dried out and crosslinked (Stratalinker, Stratagene). The membrane was then treated with express-hyb hybridization solution (Clontech) for 1 h at 37°C. U6 and BHRF1-2, 1-2\*, and 1-3 complementary oligos were labeled with gamma-p32 ATP using T4 PNK (NEB) (primers 22-25 in Supplementary Table 1). Labeled oligos were allowed to incubate with the nylon membrane for 1 h at 37°C and then washed. Membranes were exposed to Biomax MS film.

## Shallow sequencing

EBNA-LP shallow sequencing was performed by first generating cDNA from total B95-8 LCL RNA using SuperScript IV according to the manufacturer's protocol (ThermoFisher Scientific). EBNA-LP transcripts were then PCR amplified and cloned into the SpeI and PstI digestion sites in pGEM-5ZF+ (primers 26 and 27 in Supplementary Table 1) (Promega). Individual clones were isolated and sequenced using the T7 and SP6 sequencing primers.

## Acknowledgments

The research reported in this manuscript was supported by National Institute of Health grant R01-AI067968. B.C.P. and A.M.P. were supported by T32-CA009111 and A.M.P. was also supported by F31-CA180451.

The authors thank Benjamin tenOever and Didier Trono for the gift of reagents used in this research. The authors would also like to thank the Duke Cancer Institute Flow Cytometry Shared Resource Core for their help with collecting flow cytometry data. Lastly, the authors would like to thank the Duke sequencing and genomic technologies shared resource center, especially Olivier Fedrigo, for help with the PacBio sequencing.



## References

Aguado, L.C., Schmid, S., May, J., Sabin, L.R., Panis, M., Blanco-Melo, D., Shim, J. V., Sachs, D., Cherry, S., Simon, A.E., Levrud, J.-P., Tenover, B.R., 2017. RNase III nucleases from diverse kingdoms serve as antiviral effectors. *Nature* 547, 114–117.

doi:10.1038/nature22990

Albanese, M., Tagawa, T., Bouvet, M., Maliqi, L., Lutter, D., Hoser, J., Hastreiter, M., Hayes, M., Sugden, B., Martin, L., Moosmann, A., Hammerschmidt, W., 2016. Epstein–Barr virus microRNAs reduce immune surveillance by virus-specific CD8 + T cells. *Proc. Natl. Acad. Sci.* 113, E6467–E6475. doi:10.1073/pnas.1605884113

doi:10.1073/pnas.1605884113

Arvey, A., Tempera, I., Tsai, K., Chen, H.S., Tikhmyanova, N., Klichinsky, M., Leslie, C., Lieberman, P.M., 2012. An atlas of the Epstein-Barr virus transcriptome and epigenome reveals host-virus regulatory interactions. *Cell Host Microbe* 12, 233–245.

doi:10.1016/j.chom.2012.06.008

Austin, P.J., Flemington, E., Yandava, C.N., Strominger, J.L., Speck, S.H., 1988. Complex transcription of the Epstein-Barr virus BamHI fragment H rightward open reading frame 1 (BHRF1) in latently and lytically infected B lymphocytes. *Proc. Natl. Acad. Sci. U. S. A.* 85, 3678–3682. doi:10.1073/pnas.85.11.3678

Bell, A., Skinner, J., Kirby, H., Rickinson, A., 1998. Characterisation of regulatory sequences at the Epstein-Barr virus BamHI W promoter. *Virology* 252, 149–161.

doi:10.1006/viro.1998.9440

Bernhardt, K., Haar, J., Tsai, M.H., Poirey, R., Feederle, R., Delecluse, H.J., 2016. A Viral microRNA Cluster Regulates the Expression of PTEN, p27 and of a bcl-2 Homolog. *PLoS Pathog.* 12, 1–28. doi:10.1371/journal.ppat.1005405

Bodescot, M., Perricaudet, M., 1986. Epstein-barr virus mRNAs produced by alternative splicing. *Nucleic Acids Res.* 14, 7103–7114. doi:10.1093/nar/14.17.7103

Cai, X., Hagedorn, C.H., Cullen, B.R., 2004. Human microRNAs are processed from capped,

1  
2  
3  
4 polyadenylated transcripts that can also function as mRNAs. *RNA* 10, 1957–1966.

5  
6 doi:10.1261/rna.7135204

7  
8 Cai, X., Schäfer, A., Lu, S., Bilello, J.P., Desrosiers, R.C., Edwards, R., Raab-Traub, N., Cullen,  
9 B.R., 2006. Epstein-Barr virus microRNAs are evolutionarily conserved and differentially  
10 expressed. *PLoS Pathog.* 2, 0236–0247. doi:10.1371/journal.ppat.0020023

11  
12  
13  
14  
15  
16  
17  
18  
19  
20  
21  
22  
23  
24  
25  
26  
27  
28  
29  
30  
31  
32  
33  
34  
35  
36  
37  
38  
39  
40  
41  
42  
43  
44  
45  
46  
47  
48  
49  
50  
51  
52  
53  
54  
55  
56  
57  
58  
59  
60  
61  
62  
63  
64  
65

Chen, C., Ridzon, D.A., Broomer, A.J., Zhou, Z., Lee, D.H., Nguyen, J.T., Barbisin, M., Xu, N.L.,  
Mahuvakar, V.R., Andersen, M.R., Lao, K.Q., Livak, K.J., Guegler, K.J., 2005. Real-time  
quantification of microRNAs by stem-loop RT-PCR. *Nucleic Acids Res.* 33, 1–9.  
doi:10.1093/nar/gni178

Chendrimada, T.P., Gregory, R.I., Kumaraswamy, E., Norman, J., Cooch, N., Nishikura, K.,  
Shiekhattar, R., 2005. TRBP recruits the Dicer complex to Ago2 for microRNA processing  
and gene silencing. *Nature* 436, 740–744. doi:10.1038/nature03868

Chong, M.M.W., Zhang, G., Cheloufi, S., Neubert, T.A., Hannon, G.J., Littman, D.R., 2010.  
Canonical and alternate functions of the microRNA biogenesis machinery. *Genes Dev.* 24,  
1951–1960. doi:10.1101/gad.1953310

Dölken, L., Ruzsics, Z., Rädle, B., Mages, R.G., Hoffmann, R., Dickinson, P., Forster, T., 2008.  
High-resolution gene expression profiling for simultaneous kinetic parameter analysis of  
RNA synthesis and decay High-resolution gene expression profiling for simultaneous  
kinetic parameter analysis of RNA synthesis and decay. *Rna* 1959–1972.  
doi:10.1261/rna.1136108.Standard

Duffy, E.E., Rutenberg-Schoenberg, M., Stark, C.D., Kitchen, R.R., Gerstein, M.B., Simon,  
M.D., 2015. Tracking Distinct RNA Populations Using Efficient and Reversible Covalent  
Chemistry. *Mol. Cell* 59, 858–866. doi:10.1016/j.molcel.2015.07.023

Feederle, R., Haar, J., Bernhardt, K., Linnstaedt, S.D., Bannert, H., Lips, H., Cullen, B.R.,  
Delecluse, H.-J.J., 2011a. The members of an Epstein-Barr virus microRNA cluster  
cooperate to transform B lymphocytes. *J. Virol.* 85, 9801–9810. doi:JVI.05100-11 [pii]

1  
2  
3  
4 10.1128/JVI.05100-11

5  
6 Feederle, R., Linnstaedt, S.D., Bannert, H., Lips, H., Bencun, M., Cullen, B.R., Delecluse, H.J.,  
7  
8 2011b. A viral microRNA cluster strongly potentiates the transforming properties of a  
9  
10 human herpesvirus. PLoS Pathog. 7. doi:10.1371/journal.ppat.1001294

11  
12  
13 Grundhoff, A., Sullivan, C.S., Ganem, D., 2006. A combined computational and microarray-  
14  
15 based approach identifies novel microRNAs encoded by human gamma-herpesviruses.  
16  
17 RNA 12, 733–750. doi:10.1261/rna.2326106

18  
19  
20 Guo, H., Ingolia, N.T., Weissman, J.S., Bartel, D.P., 2010. Mammalian microRNAs  
21  
22 predominantly act to decrease target mRNA levels. Nature 466, 835–840.  
23  
24 doi:10.1038/nature09267

25  
26 Haar, J., Contrant, M., Bernhardt, K., Feederle, R., Diederichs, S., Pfeffer, S., Delecluse, H.J.,  
27  
28 2015. The expression of a viral microRNA is regulated by clustering to allow optimal B cell  
29  
30 transformation. Nucleic Acids Res. 44, 1326–1341. doi:10.1093/nar/gkv1330

31  
32  
33 Han, J., Pedersen, J.S., Kwon, S.C., Belair, C.D., Kim, Y.K., Yeom, K.H., Yang, W.Y., Haussler,  
34  
35 D., Bilelloch, R., Kim, V.N., 2009. Posttranscriptional Crossregulation between Drosha and  
36  
37 DGCR8. Cell 136, 75–84. doi:10.1016/j.cell.2008.10.053

38  
39  
40 Harada, S., Kieff, E., 1997. Epstein-Barr virus nuclear protein LP stimulates EBNA-2 acidic  
41  
42 domain-mediated transcriptional activation. J. Virol. 71, 6611–8.

43  
44  
45 Huntzinger, E., Izaurralde, E., 2011. Gene silencing by microRNAs: contributions of translational  
46  
47 repression and mRNA decay. Nat. Publ. Gr. 12. doi:10.1038/nrg2936

48  
49  
50 Kang, D., Skalsky, R.L., Cullen, B.R., 2015. EBV BART MicroRNAs Target Multiple Pro-  
51  
52 apoptotic Cellular Genes to Promote Epithelial Cell Survival. PLoS Pathog. 11, e1004979.  
53  
54 doi:10.1371/journal.ppat.1004979

55  
56 Kennedy, E.M., Whisnant, A.W., Kornepati, A.V.R., Marshall, J.B., Bogerd, H.P., Cullen, B.R.,  
57  
58 2015. Production of functional small interfering RNAs by an amino-terminal deletion mutant  
59  
60 of human Dicer. Proc. Natl. Acad. Sci. 112, E6945–E6954. doi:10.1073/pnas.1513421112

- 1  
2  
3  
4 Kim, D., Pertea, M., Kim, D., Pertea, G.M., Leek, J.T., Salzberg, S.L., 2016. Transcript-level  
5  
6 expression analysis of RNA- seq experiments with HISAT , StringTie and Transcript-level  
7  
8 expression analysis of RNA-seq experiments with HISAT , StringTie and Ballgown. Nat.  
9  
10 Protoc. 11, 1650–1667. doi:10.1038/nprot.2016-095  
11  
12  
13 Kirby, H., Rickinson, A., Bell, A., 2000. The activity of the Epstein-Barr virus BamHI W promoter  
14  
15 in B cells is dependent on the binding of CREB/ATF factors. J. Gen. Virol. 81, 1057–1066.  
16  
17 doi:10.1099/0022-1317-81-4-1057  
18  
19  
20 Knuckles, P., Vogt, M.A., Lugert, S., Milo, M., Chong, M.M.W., Hautbergue, G.M., Wilson, S.A.,  
21  
22 Littman, D.R., Taylor, V., 2012. Drosha regulates neurogenesis by controlling Neurogenin 2  
23  
24 expression independent of microRNAs. Nat. Neurosci. 15, 962–969. doi:10.1038/nn.3139  
25  
26  
27 Lappalainen, T., Sammeth, M., Friedländer, M.R., 't Hoen, P.A.C., Monlong, J., Rivas, M.A.,  
28  
29 González-Porta, M., Kurbatova, N., Griebel, T., Ferreira, P.G., Barann, M., Wieland, T.,  
30  
31 Greger, L., van Iterson, M., Almlöf, J., Ribeca, P., Pulyakhina, I., Esser, D., Giger, T.,  
32  
33 Tikhonov, A., Sultan, M., Bertier, G., MacArthur, D.G., Lek, M., Lizano, E., Buermans,  
34  
35 H.P.J., Padioleau, I., Schwarzmayr, T., Karlberg, O., Ongen, H., Kilpinen, H., Beltran, S.,  
36  
37 Gut, M., Kahlem, K., Amstislavskiy, V., Stegle, O., Pirinen, M., Montgomery, S.B.,  
38  
39 Donnelly, P., McCarthy, M.I., Flicek, P., Strom, T.M., The Geuvadis Consortium, Lehrach,  
40  
41 H., Schreiber, S., Sudbrak, R., Carracedo, Á., Antonarakis, S.E., Häslér, R., Syvänen, A.-  
42  
43 C., van Ommen, G.-J., Brazma, A., Meitinger, T., Rosenstiel, P., Guigó, R., Gut, I.G.,  
44  
45 Estivill, X., Dermitzakis, E.T., 2013. Transcriptome and genome sequencing uncovers  
46  
47 functional variation in humans. Nature 501, 506–511. doi:10.1038/nature12531  
48  
49  
50  
51 Lei, T., Yuen, K.-S., Xu, R., Tsao, S.W., Chen, H., Li, M., Kok, K.-H., Jin, D.-Y., 2013. Targeting  
52  
53 of DICE1 tumor suppressor by Epstein-Barr virus-encoded miR-BART3\* microRNA in  
54  
55 nasopharyngeal carcinoma. Int. J. cancer 133, 79–87. doi:10.1002/ijc.28007  
56  
57  
58 Lin, Y.-T., Sullivan, C.S., 2011. Expanding the role of Drosha to the regulation of viral gene  
59  
60 expression. Proc. Natl. Acad. Sci. U. S. A. 108, 11229–34. doi:10.1073/pnas.1105799108  
61  
62  
63  
64  
65

- 1  
2  
3  
4 Liu, J., Carmell, M.A., Rivas, F. V, Marsden, C.G., Thomson, J.M., Song, J.-J., Hammond, S.M.,  
5  
6 Joshua-Tor, L., Hannon, G.J., 2004. Argonaute2 Is the Catalytic Engine of Mammalian  
7  
8 RNAi. *Science* (80-. ). 305, 1437–1441. doi:10.1126/science.1102513  
9  
10  
11 Marinaro, F., Marzi, M.J., Hoffmann, N., Amin, H., Pelizzoli, R., Niola, F., Nicassio, F., De Pietri  
12  
13 Tonelli, D., 2017. MicroRNA-independent functions of DGCR8 are essential for neocortical  
14  
15 development and TBR1 expression. *EMBO Rep.* 18, e201642800.  
16  
17 doi:10.15252/embr.201642800  
18  
19  
20 Meister, G., Landthaler, M., Patkaniowska, A., Dorsett, Y., Teng, G., Tuschl, T., 2004. Human  
21  
22 Argonaute2 mediates RNA cleavage targeted by miRNAs and siRNAs. *Mol. Cell* 15, 185–  
23  
24 197. doi:10.1016/j.molcel.2004.07.007  
25  
26  
27 Nitsche, F., Bell, A., Rickinson, A., 1997. Epstein-Barr virus leader protein enhances EBNA-2-  
28  
29 mediated transactivation of latent membrane protein 1 expression: a role for the W1W2  
30  
31 repeat domain. *J. Virol.* 71, 6619–28.  
32  
33  
34 O’Grady, T., Wang, X., Höner Zu Bentrup, K., Baddoo, M., Concha, M., Flemington, E.K., 2016.  
35  
36 Global transcript structure resolution of high gene density genomes through multi-platform  
37  
38 data integration. *Nucleic Acids Res.* 44, 1–17. doi:10.1093/nar/gkw629  
39  
40  
41 Peng, R., Gordadze, A. V, Fuentes Pananá, E.M., Wang, F., Zong, J., Hayward, G.S., Tan, J.,  
42  
43 Ling, P.D., 2000. Sequence and functional analysis of EBNA-LP and EBNA2 proteins from  
44  
45 nonhuman primate lymphocryptoviruses. *J. Virol.* 74, 379–389. doi:10.1128/JVI.74.1.379-  
46  
47 389.2000  
48  
49  
50 Peng, R., Moses, S.C., Tan, J., Kremmer, E., Ling, P.D., 2005. The Epstein-Barr virus EBNA-LP  
51  
52 protein preferentially coactivates EBNA2-mediated stimulation of latent membrane proteins  
53  
54 expressed from the viral divergent promoter. *J. Virol.* 79, 4492–505.  
55  
56 doi:10.1128/JVI.79.7.4492-4505.2005  
57  
58  
59 Peng, R., Tan, J., Ling, P.D., 2000. Conserved Regions in the Epstein-Barr Virus Leader Protein  
60  
61 Define Distinct Domains Required for Nuclear Localization and Transcriptional Cooperation  
62  
63  
64  
65

- 1  
2  
3  
4 with EBNA2. *J. Virol.* 74, 9953–9963. doi:10.1128/JVI.74.21.9953-9963.2000  
5  
6 Pfeffer, S., 2004. Identification of Virus-Encoded MicroRNAs. *Science* (80-. ). 304, 734–736.  
7  
8 doi:10.1126/science.1096781  
9  
10 Pfitzner, A.J., Tsai, E.C., Strominger, J.L., Speck, S.H., 1987. Isolation and characterization of  
11  
12 cDNA clones corresponding to transcripts from the BamHI H and F regions of the Epstein-  
13  
14 Barr virus genome. *J Virol* 61, 2902–2909.  
15  
16 Poling, B.C., Tsai, K., Kang, D., Ren, L., Kennedy, E.M., Cullen, B.R., 2017. A lentiviral vector  
17  
18 bearing a reverse intron demonstrates superior expression of both proteins and  
19  
20 microRNAs. *RNA Biol.* 00–00. doi:10.1080/15476286.2017.1334755  
21  
22  
23 Rickinson, A.B., Kieff, E., 2007. *Fields' Virology*, 5th ed. Lippincott Williams & Wilkins,  
24  
25 Philadelphia.  
26  
27  
28 Riley, K.J., Rabinowitz, G.S., Yario, T.A., Luna, J.M., Darnell, R.B., Steitz, J.A., 2012. EBV and  
29  
30 human microRNAs co-target oncogenic and apoptotic viral and human genes during  
31  
32 latency. *EMBO J.* 31, 2207–21. doi:10.1038/emboj.2012.63  
33  
34  
35 Riley, K.J.L., Rabinowitz, G.S., Steitz, J.A., 2010. Comprehensive Analysis of Rhesus  
36  
37 Lymphocryptovirus MicroRNA Expression. *J. Virol.* 84, 5148–5157. doi:10.1128/JVI.00110-  
38  
39 10  
40  
41  
42 Robinson, J.T., Thorvaldsdottir, H., Winckler, W., Guttman, M., Lander, E.S., Getz, G., Mesirov,  
43  
44 J.P., 2011. Integrative genomics viewer. *Nat Biotech* 29, 24–26.  
45  
46  
47 Rogers, R.P., Woisetschlaeger, M., Speck, S.H., 1990. Alternative splicing dictates translational  
48  
49 start in Epstein-Barr virus transcripts. *EMBO J.* 9, 2273–7.  
50  
51 Seto, E., Moosmann, A., Grömminger, S., Walz, N., Grundhoff, A., Hammerschmidt, W., 2010.  
52  
53 Micro RNAs of Epstein-Barr virus promote cell cycle progression and prevent apoptosis of  
54  
55 primary human B cells. *PLoS Pathog.* 6, 69–70. doi:10.1371/journal.ppat.1001063  
56  
57  
58 Shenoy, A., Blelloch, R., 2009. Genomic analysis suggests that mRNA destabilization by the  
59  
60 microprocessor is specialized for the autoregulation of Dgcr8. *PLoS One* 4.  
61  
62  
63  
64  
65

1  
2  
3  
4 doi:10.1371/journal.pone.0006971

5  
6 Skalsky, R.L., Corcoran, D.L., Gottwein, E., Frank, C.L., Kang, D., Hafner, M., Nusbaum, J.D.,  
7  
8 Feederle, R., Delecluse, H.J., Luftig, M.A., Tuschl, T., Ohler, U., Cullen, B.R., 2012. The  
9  
10 viral and cellular microRNA targetome in lymphoblastoid cell lines. PLoS Pathog. 8.

11  
12  
13 doi:10.1371/journal.ppat.1002484

14  
15 Skalsky, R.L., Kang, D., Linnstaedt, S.D., Cullen, B.R., 2014. Evolutionary conservation of  
16  
17 primate lymphocryptovirus microRNA targets. J. Virol. 88, 1617–35.

18  
19  
20 doi:10.1128/JVI.02071-13

21  
22 Sundaram, G.M., Common, J.E.A., Gopal, F.E., Srikanta, S., Lakshman, K., Lunny, D.P., Lim,  
23  
24 T.C., Tanavde, V., Lane, E.B., Sampath, P., 2013. “See-saw” expression of microRNA-198  
25  
26 and FSTL1 from a single transcript in wound healing. Nature 495, 103–106.

27  
28  
29 doi:10.1038/nature11890

30  
31 Sung, N.S., Kenney, S., Gutsch, D., Pagano, J.S., 1991. EBNA-2 transactivates a lymphoid-  
32  
33 specific enhancer in the BamHI C promoter of Epstein-Barr virus. J. Virol. 65, 2164–2169.

34  
35 Tagawa, T., Albanese, M., Bouvet, M., Moosman, A., Mautner, J., Heissmeyer, V., Zielinski, C.,  
36  
37 Hoser, J., Hastreiter, M., Hayes, M., Sugden, B., Hammerschmidt, W., 2016. Epstein-Barr  
38  
39 Viral miRNAs inhibit antiviral CD4 + T cell responses targeting IL-12 and antigen  
40  
41 presentation. J. Exp. Med. 213, 2065–2080. doi:10.1084/jem.20160248

42  
43  
44 Tierney, R., Kirby, H., Nagra, J., Rickinson, A., Bell, A., 2000. The Epstein-Barr Virus Promoter  
45  
46 Initiating B-Cell Transformation Is Activated by RFX Proteins and the B-Cell-Specific  
47  
48 Activator Protein BSAP/Pax5. J. Virol. 74, 10458–10467. doi:10.1128/JVI.74.22.10458-  
49  
50 10467.2000

51  
52  
53 Tierney, R.J., Kao, K.-Y.K., Nagra, J.K., Rickinson, A.B., 2011. Epstein-Barr Virus BamHI W  
54  
55 Repeat Number Limits EBNA2 / EBNA-LP Coexpression in Newly Infected B Cells and the  
56  
57 Efficiency of B-Cell Transformation : a Rationale for the Multiple W Repeats in Wild-Type  
58  
59 Virus Strains Epstein-Barr Virus BamHI W Repeat Number. J. Virol. 85, 12362–12375.

1  
2  
3  
4 doi:10.1128/JVI.06059-11

5  
6 Tierney, R.J., Shannon-Lowe, C.D., Fitzsimmons, L., Bell, A.I., Rowe, M., 2015. Unexpected  
7 patterns of Epstein-Barr virus transcription revealed by a High throughput PCR array for  
8 absolute quantification of viral mRNA. *Virology* 474, 117–130.

9  
10  
11  
12  
13 doi:10.1016/j.virol.2014.10.030

14  
15 Tilgner, H., Grubert, F., Sharon, D., Snyder, M.P., 2014. Defining a personal, allele-specific, and  
16 single-molecule long-read transcriptome. *Proc. Natl. Acad. Sci.* 111, 9869–9874.

17  
18  
19  
20  
21 doi:10.1073/pnas.1400447111

22  
23 Walz, N., Christalla, T., Tessmer, U., Grundhoff, A., 2010. A Global Analysis of Evolutionary  
24 Conservation among Known and Predicted Gammaherpesvirus MicroRNAs. *J. Virol.* 84,  
25 716–728. doi:10.1128/JVI.01302-09

26  
27  
28 Wang, F., Tsang, S.F., Kurilla, M.G., Cohen, J.I., Kieff, E., 1990. Epstein-Barr virus nuclear  
29 antigen 2 transactivates latent membrane protein LMP1. *J. Virol.* 64, 3407–16.

30  
31  
32  
33  
34  
35  
36  
37  
38  
39  
40  
41  
42  
43  
44  
45  
46  
47  
48  
49  
50  
51  
52  
53  
54  
55  
56  
57  
58  
59  
60  
61  
62  
63  
64  
65  
66  
67  
68  
69  
70  
71  
72  
73  
74  
75  
76  
77  
78  
79  
80  
81  
82  
83  
84  
85  
86  
87  
88  
89  
90  
91  
92  
93  
94  
95  
96  
97  
98  
99  
100  
101  
102  
103  
104  
105  
106  
107  
108  
109  
110  
111  
112  
113  
114  
115  
116  
117  
118  
119  
120  
121  
122  
123  
124  
125  
126  
127  
128  
129  
130  
131  
132  
133  
134  
135  
136  
137  
138  
139  
140  
141  
142  
143  
144  
145  
146  
147  
148  
149  
150  
151  
152  
153  
154  
155  
156  
157  
158  
159  
160  
161  
162  
163  
164  
165  
166  
167  
168  
169  
170  
171  
172  
173  
174  
175  
176  
177  
178  
179  
180  
181  
182  
183  
184  
185  
186  
187  
188  
189  
190  
191  
192  
193  
194  
195  
196  
197  
198  
199  
200  
201  
202  
203  
204  
205  
206  
207  
208  
209  
210  
211  
212  
213  
214  
215  
216  
217  
218  
219  
220  
221  
222  
223  
224  
225  
226  
227  
228  
229  
230  
231  
232  
233  
234  
235  
236  
237  
238  
239  
240  
241  
242  
243  
244  
245  
246  
247  
248  
249  
250  
251  
252  
253  
254  
255  
256  
257  
258  
259  
260  
261  
262  
263  
264  
265  
266  
267  
268  
269  
270  
271  
272  
273  
274  
275  
276  
277  
278  
279  
280  
281  
282  
283  
284  
285  
286  
287  
288  
289  
290  
291  
292  
293  
294  
295  
296  
297  
298  
299  
300  
301  
302  
303  
304  
305  
306  
307  
308  
309  
310  
311  
312  
313  
314  
315  
316  
317  
318  
319  
320  
321  
322  
323  
324  
325  
326  
327  
328  
329  
330  
331  
332  
333  
334  
335  
336  
337  
338  
339  
340  
341  
342  
343  
344  
345  
346  
347  
348  
349  
350  
351  
352  
353  
354  
355  
356  
357  
358  
359  
360  
361  
362  
363  
364  
365  
366  
367  
368  
369  
370  
371  
372  
373  
374  
375  
376  
377  
378  
379  
380  
381  
382  
383  
384  
385  
386  
387  
388  
389  
390  
391  
392  
393  
394  
395  
396  
397  
398  
399  
400  
401  
402  
403  
404  
405  
406  
407  
408  
409  
410  
411  
412  
413  
414  
415  
416  
417  
418  
419  
420  
421  
422  
423  
424  
425  
426  
427  
428  
429  
430  
431  
432  
433  
434  
435  
436  
437  
438  
439  
440  
441  
442  
443  
444  
445  
446  
447  
448  
449  
450  
451  
452  
453  
454  
455  
456  
457  
458  
459  
460  
461  
462  
463  
464  
465  
466  
467  
468  
469  
470  
471  
472  
473  
474  
475  
476  
477  
478  
479  
480  
481  
482  
483  
484  
485  
486  
487  
488  
489  
490  
491  
492  
493  
494  
495  
496  
497  
498  
499  
500  
501  
502  
503  
504  
505  
506  
507  
508  
509  
510  
511  
512  
513  
514  
515  
516  
517  
518  
519  
520  
521  
522  
523  
524  
525  
526  
527  
528  
529  
530  
531  
532  
533  
534  
535  
536  
537  
538  
539  
540  
541  
542  
543  
544  
545  
546  
547  
548  
549  
550  
551  
552  
553  
554  
555  
556  
557  
558  
559  
560  
561  
562  
563  
564  
565  
566  
567  
568  
569  
570  
571  
572  
573  
574  
575  
576  
577  
578  
579  
580  
581  
582  
583  
584  
585  
586  
587  
588  
589  
590  
591  
592  
593  
594  
595  
596  
597  
598  
599  
600  
601  
602  
603  
604  
605  
606  
607  
608  
609  
610  
611  
612  
613  
614  
615  
616  
617  
618  
619  
620  
621  
622  
623  
624  
625  
626  
627  
628  
629  
630  
631  
632  
633  
634  
635  
636  
637  
638  
639  
640  
641  
642  
643  
644  
645  
646  
647  
648  
649  
650  
651  
652  
653  
654  
655  
656  
657  
658  
659  
660  
661  
662  
663  
664  
665  
666  
667  
668  
669  
670  
671  
672  
673  
674  
675  
676  
677  
678  
679  
680  
681  
682  
683  
684  
685  
686  
687  
688  
689  
690  
691  
692  
693  
694  
695  
696  
697  
698  
699  
700  
701  
702  
703  
704  
705  
706  
707  
708  
709  
710  
711  
712  
713  
714  
715  
716  
717  
718  
719  
720  
721  
722  
723  
724  
725  
726  
727  
728  
729  
730  
731  
732  
733  
734  
735  
736  
737  
738  
739  
740  
741  
742  
743  
744  
745  
746  
747  
748  
749  
750  
751  
752  
753  
754  
755  
756  
757  
758  
759  
760  
761  
762  
763  
764  
765  
766  
767  
768  
769  
770  
771  
772  
773  
774  
775  
776  
777  
778  
779  
780  
781  
782  
783  
784  
785  
786  
787  
788  
789  
790  
791  
792  
793  
794  
795  
796  
797  
798  
799  
800  
801  
802  
803  
804  
805  
806  
807  
808  
809  
810  
811  
812  
813  
814  
815  
816  
817  
818  
819  
820  
821  
822  
823  
824  
825  
826  
827  
828  
829  
830  
831  
832  
833  
834  
835  
836  
837  
838  
839  
840  
841  
842  
843  
844  
845  
846  
847  
848  
849  
850  
851  
852  
853  
854  
855  
856  
857  
858  
859  
860  
861  
862  
863  
864  
865  
866  
867  
868  
869  
870  
871  
872  
873  
874  
875  
876  
877  
878  
879  
880  
881  
882  
883  
884  
885  
886  
887  
888  
889  
890  
891  
892  
893  
894  
895  
896  
897  
898  
899  
900  
901  
902  
903  
904  
905  
906  
907  
908  
909  
910  
911  
912  
913  
914  
915  
916  
917  
918  
919  
920  
921  
922  
923  
924  
925  
926  
927  
928  
929  
930  
931  
932  
933  
934  
935  
936  
937  
938  
939  
940  
941  
942  
943  
944  
945  
946  
947  
948  
949  
950  
951  
952  
953  
954  
955  
956  
957  
958  
959  
960  
961  
962  
963  
964  
965  
966  
967  
968  
969  
970  
971  
972  
973  
974  
975  
976  
977  
978  
979  
980  
981  
982  
983  
984  
985  
986  
987  
988  
989  
990  
991  
992  
993  
994  
995  
996  
997  
998  
999  
1000



1  
2  
3  
4  
5  
6  
7  
8  
9  
10  
11  
12  
13  
14  
15  
16  
17  
18  
19  
20  
21  
22  
23  
24  
25  
26  
27  
28  
29  
30  
31  
32  
33  
34  
35  
36  
37  
38  
39  
40  
41  
42  
43  
44  
45  
46  
47  
48  
49  
50  
51  
52  
53  
54  
55  
56  
57  
58  
59  
60  
61  
62  
63  
64  
65

1333. doi:10.1016/S1097-2765(02)00541-5

Zhu, J.Y., Pfuhl, T., Motsch, N., Barth, S., Nicholls, J., Grasser, F., Meister, G., 2009.

Identification of Novel Epstein-Barr Virus MicroRNA Genes from Nasopharyngeal

Carcinomas. *J. Virol.* 83, 3333–3341. doi:10.1128/JVI.01689-08

## Figure Legends

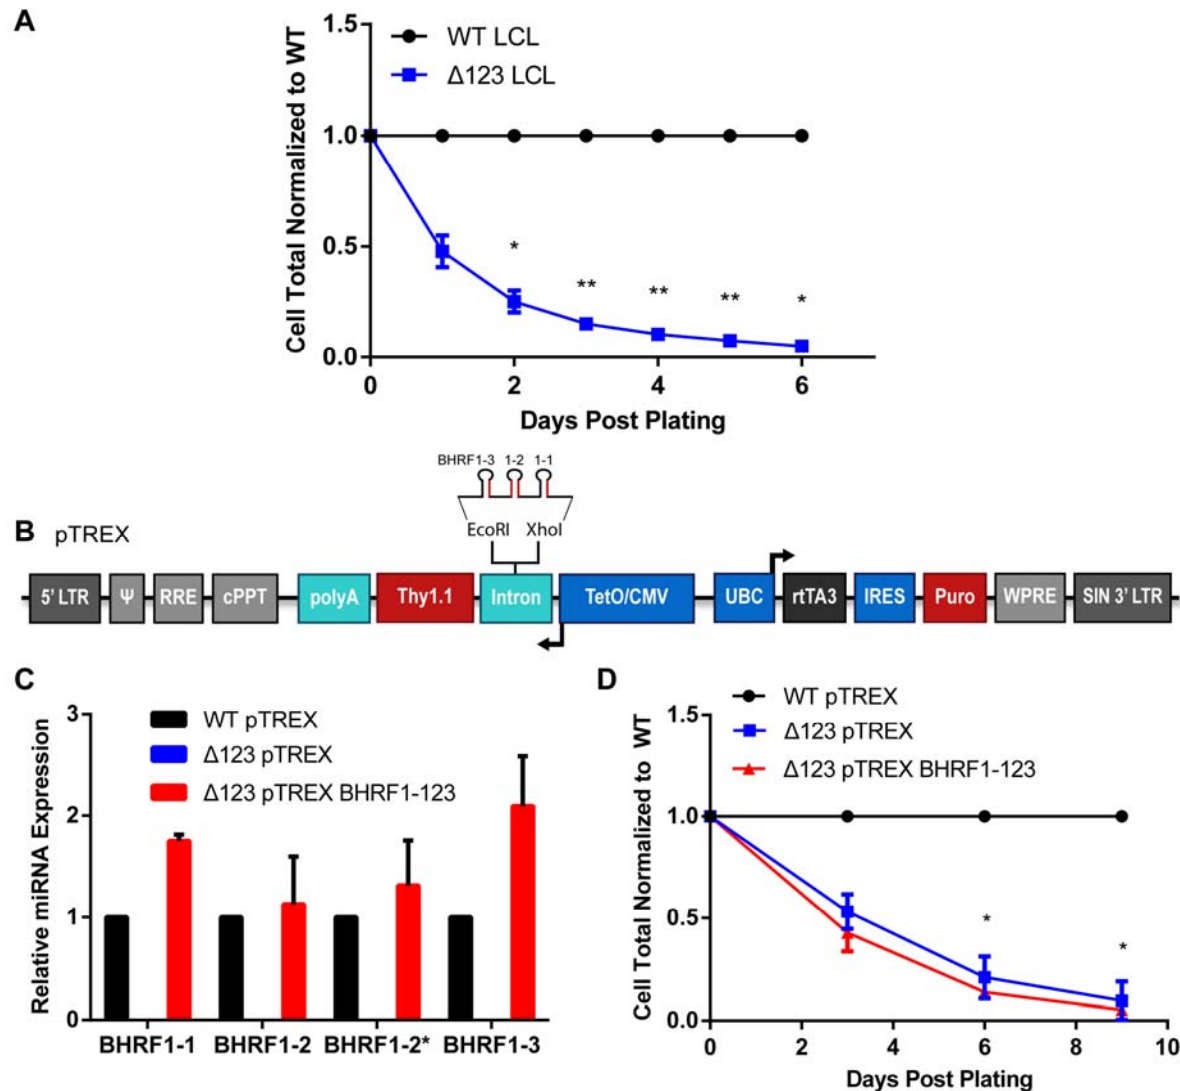

**Figure 1.** Ectopic expression of the BHRF1 miRNAs does not rescue rapid  $\Delta 123$  LCL growth. (A)

Total intact cells were counted by flow cytometry for WT and  $\Delta 123$  LCLs every day for six days.

$\Delta 123$  LCL total cell count was normalized to WT cell total, which was set at 1.0. Average of three

donors. \* $p < 0.05$ , \*\* $p < 0.01$ ; one-sample t-test. (B) Schematic of the pTRES vector used to express

the BHRF1 miRNAs (Poling et al., 2017). Pri-miRNAs, shown in red, were cloned between the

XhoI and EcoRI sites present inside the intron 5' of Thy1.1. miRNA expression was driven from

an antisense tet-inducible minimal CMV promoter (TetO/CMV). pTRES also contains an ubiquitin

C promoter (UBC) promoter that drives the constitutive expression of the reverse tetracycline

1  
2  
3  
4 transactivator 3 (rtTA3) protein as well as a puromycin (Puro) selectable marker located 3' to an  
5  
6 internal ribosome entry site (IRES). (C) Mature BHRF1 miRNA expression was analyzed by  
7  
8 miRNA-specific Taqman qPCR. Expression levels in  $\Delta 123$  LCLs transduced with the pTREX-  
9  
10 based miR-BHRF1-123 expression vector was normalized to the matched WT LCL donor.  
11  
12 Average of two donors with SD indicated. No miR-BHRF1 miRNAs were detected in  $\Delta 123$  LCLs  
13  
14 transduced with the parental pTREX vector. (D) LCLs were transduced with either the empty  
15  
16 pTREX vector or the miR-BHRF1-123 expressing pTREX vector. After puro selection, total  
17  
18 Thy1.1+ cells were counted every 3 days and normalized to WT cell total. Average of two donors.  
19  
20  
21 Significance determined by two-way ANOVA with multiple comparisons. \* $p < 0.05$ . Error bars=SD.  
22  
23  
24  
25  
26  
27  
28  
29  
30  
31  
32  
33  
34  
35  
36  
37  
38  
39  
40  
41  
42  
43  
44  
45  
46  
47  
48  
49  
50  
51  
52  
53  
54  
55  
56  
57  
58  
59  
60  
61  
62  
63  
64  
65

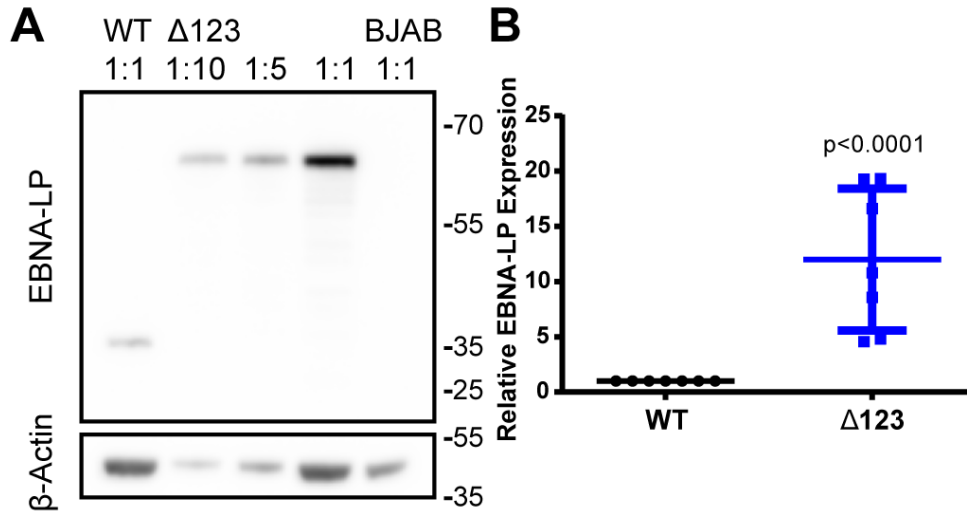

**Figure 2.** EBNA-LP is significantly overexpressed in  $\Delta 123$  LCLs. (A) Western blot of EBNA-LP expression in WT and  $\Delta 123$  LCLs. The  $\Delta 123$  LCL lysate was loaded at increasing concentration left to right, as indicated. BJAB lysate was loaded as a negative control.  $\beta$ -Actin was used as a loading control. (B)  $\Delta 123$  LCL EBNA-LP expression normalized to WT LCL levels. Average of seven donors.  $p < 0.0001$ ; one-sample t-test. Error bars = SD.

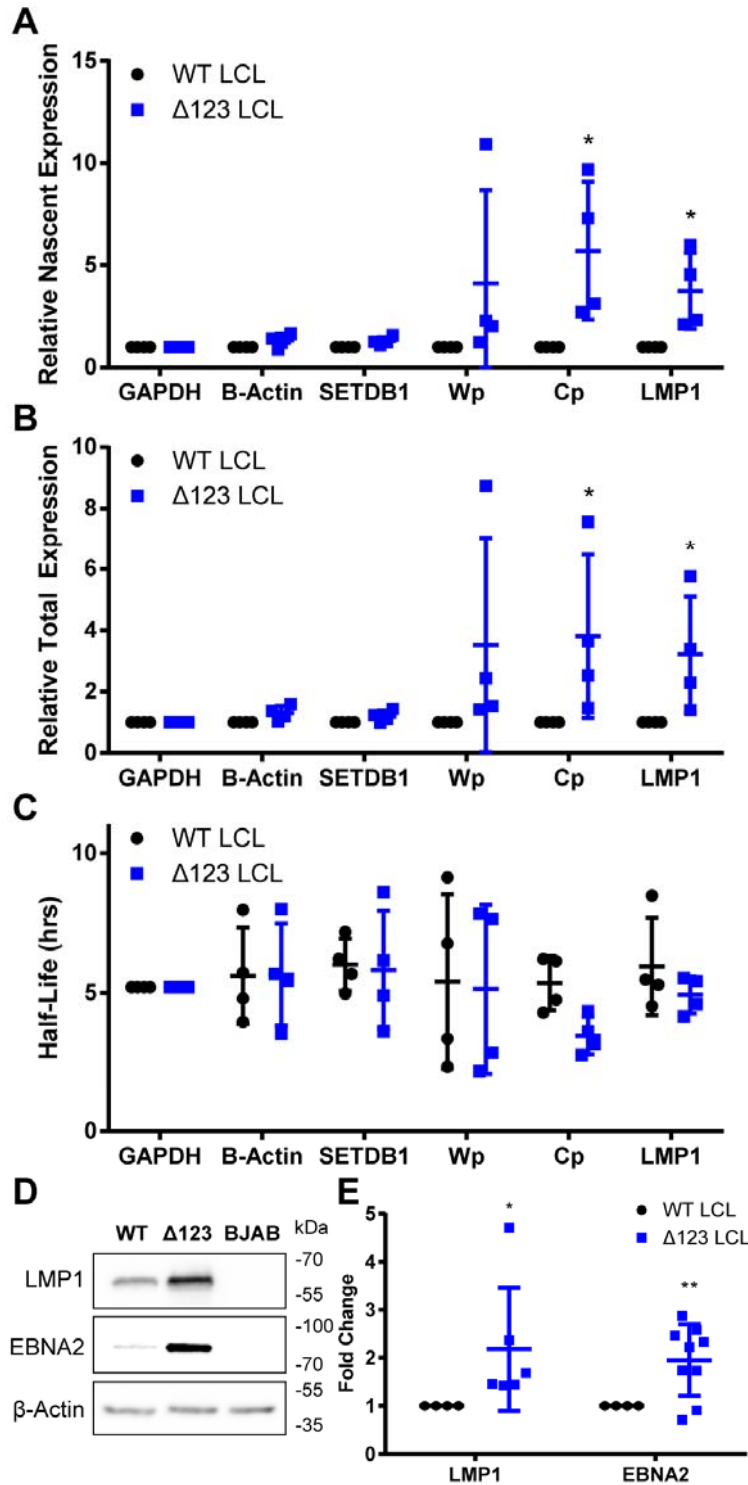

1  
2  
3  
4 **Figure 3.**  $\Delta$ 123 LCLs show an increase in EBNA-LP regulated transcription and protein  
5 expression. Transcript expression was tested by treating LCLs with 200  $\mu$ M 4SU for 1 h. Total  
6 RNA was harvested and 4SU incorporated into nascent RNA labeled with biotin and isolated using  
7 magnetic streptavidin beads. Nascent and total RNA levels were measured by qPCR and used  
8 to calculate (A) relative nascent transcription, (B) relative total transcription, and (C) half-life.  
9 GAPDH was used as a normalization control and  $\beta$ -Actin and SETDB1 were used as negative  
10 controls. Wp, W promoter driven transcripts. Cp, C promoter driven transcripts, LMP1, and  
11 CCND2 are known to be co-transcriptionally activated by EBNA-LP. \* $p < 0.05$ , one-sample t-test.  
12 Error bars = SD. (D) Western blot of EBNA-LP-regulated viral proteins LMP1 and EBNA2 from  
13 WT and  $\Delta$ 123 LCLs. BJAB lysate was used as a negative control for viral proteins. (E)  
14 Quantitation of Western blot analysis normalized to WT expression levels. Data represent the  
15 average of 6+ donors. \* $p < 0.05$ , \*\*  $p < 0.01$ ; one-sample t-test. Error bars = SD.  
16  
17  
18  
19  
20  
21  
22  
23  
24  
25  
26  
27  
28  
29  
30  
31  
32  
33  
34  
35  
36  
37  
38  
39  
40  
41  
42  
43  
44  
45  
46  
47  
48  
49  
50  
51  
52  
53  
54  
55  
56  
57  
58  
59  
60  
61  
62  
63  
64  
65

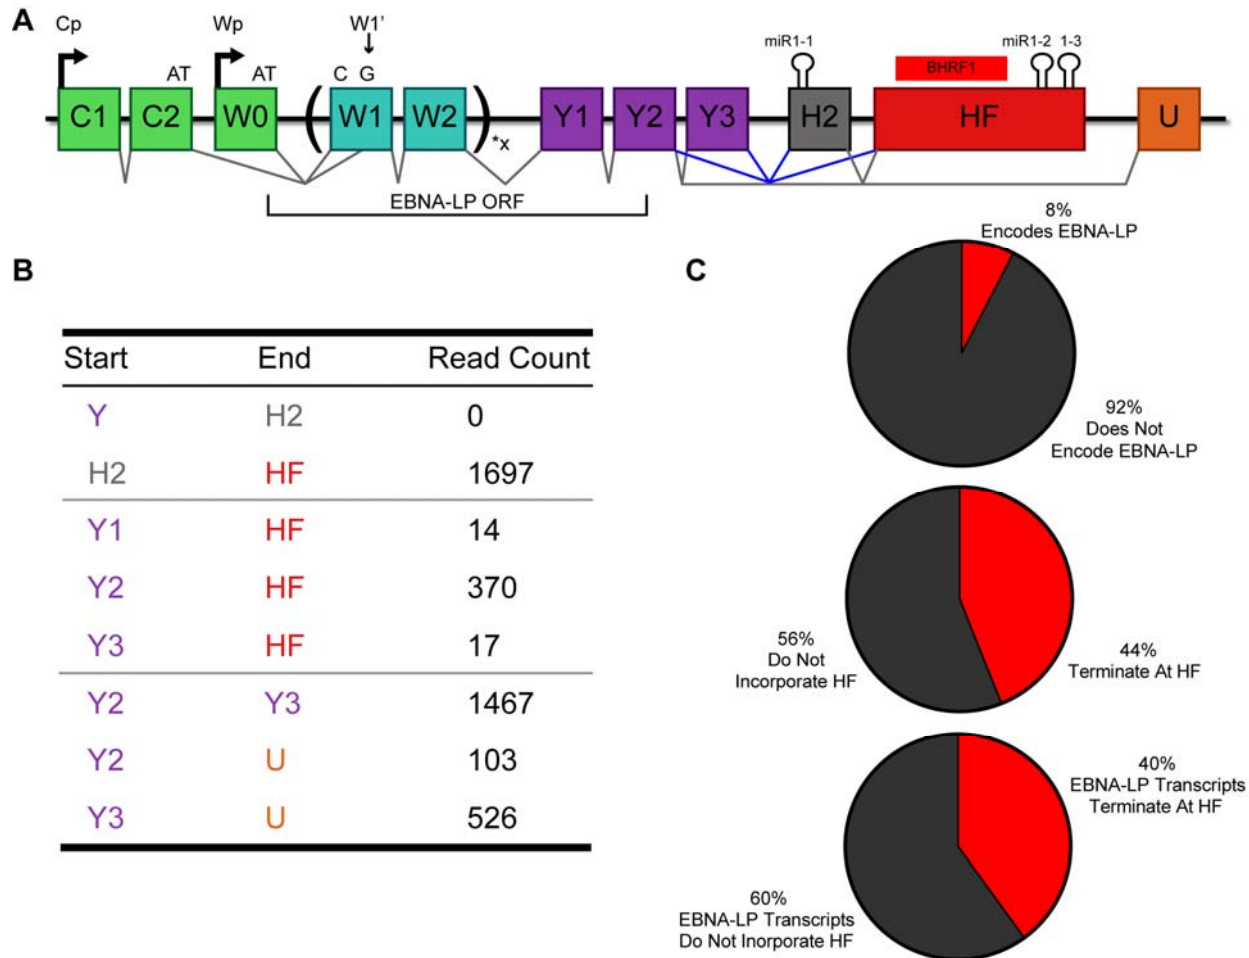

**Figure 4.** EBNA-LP encoding transcripts are alternatively spliced to include the HF exon at a high frequency. (A) Schematic of EBNA-LP alternative splicing. EBNA-LP mRNA transcription is driven by either the Cp or Wp promoter. Both promoters encode an exon that terminates in AT (C2 or W0) that must splice to a 3' splice site located within the first W1 exon, called W1', to acquire the G to make the ATG necessary to initiate EBNA-LP translation. EBNA-LP transcripts then splice to W2 and can include anywhere from 1-11 copies of the W1/W2 repeats. The coding region for EBNA-LP then terminates within the Y2 exon. The H2 exon contains the BHRF1-1 pri-miRNA and the HF exon contains the BHRF1 ORF and pri-miR-BHRF1-2 and 1-3. Known splice junctions are shown in black, including to the U exon that splices 3' to exons encoding EBNA1, 3A, 3B and 3C. Possible splice junctions that would include the BHRF1 miRNAs in the 3'UTR of EBNA-LP are shown in blue. (B) RNA-Seq data from the 1000 genomes project was processed to identify splice

1  
2  
3  
4 junctions. Raw read counts are shown for H2 and HF splicing. Canonical splice junctions are  
5  
6 provided at the bottom for reference. (C) PacBio sequencing was performed on RNA isolated  
7  
8 using a probe complementary to the W2 exon. Of the Cp and Wp driven transcripts sequenced,  
9  
10 the percentage that encode EBNA-LP, that terminate with the HF exon, and EBNA-LP mRNAs  
11  
12 that terminate with the HF exon, are shown.  
13  
14  
15  
16  
17  
18  
19  
20  
21  
22  
23  
24  
25  
26  
27  
28  
29  
30  
31  
32  
33  
34  
35  
36  
37  
38  
39  
40  
41  
42  
43  
44  
45  
46  
47  
48  
49  
50  
51  
52  
53  
54  
55  
56  
57  
58  
59  
60  
61  
62  
63  
64  
65



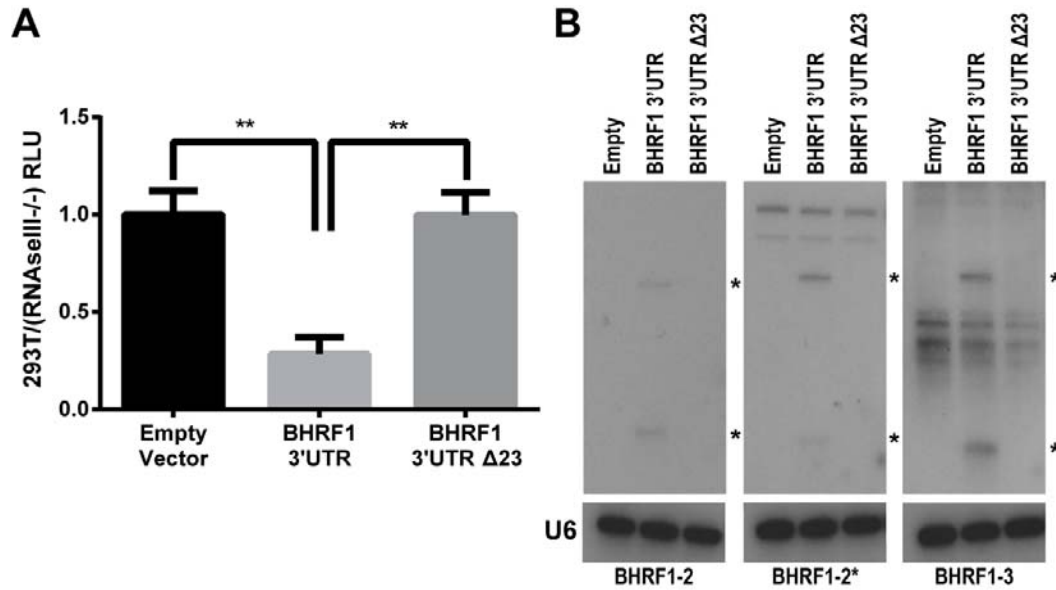

**Figure 5.** pre-miR-BHRF1-2/2\* and 1-3 miRNA excision regulates protein expression in *cis*. (A) The BHRF1 3'UTR, containing the pri-miR-BHRF1-2 and 1-3 stem-loops (Fig. 4), was cloned from both the WT and  $\Delta 123$  EBV virus into the 3'UTR of a FLuc expression vector. These vectors, along with a NanoLuc internal control vector, were transfected into both 293T cells and RNaseIII-/- cells and luciferase activity measured. Expression level was normalized to NanoLuc followed by an empty FLuc vector control. Relative 293T luciferase expression was normalized to the expression detected in the RNaseIII-/- cells to observe differences due to Drosha processing. Five biological replicates were performed. \*\* $p < 0.01$ , one-sample t-test, and student's t-test. Error bars = SD. (B) Northern blots show miRNA expression from the BHRF1 3'UTR firefly luciferase vector. Blots were probed with a U6-specific probe to demonstrate equal loading. \* Indicates pre- and mature miRNAs.

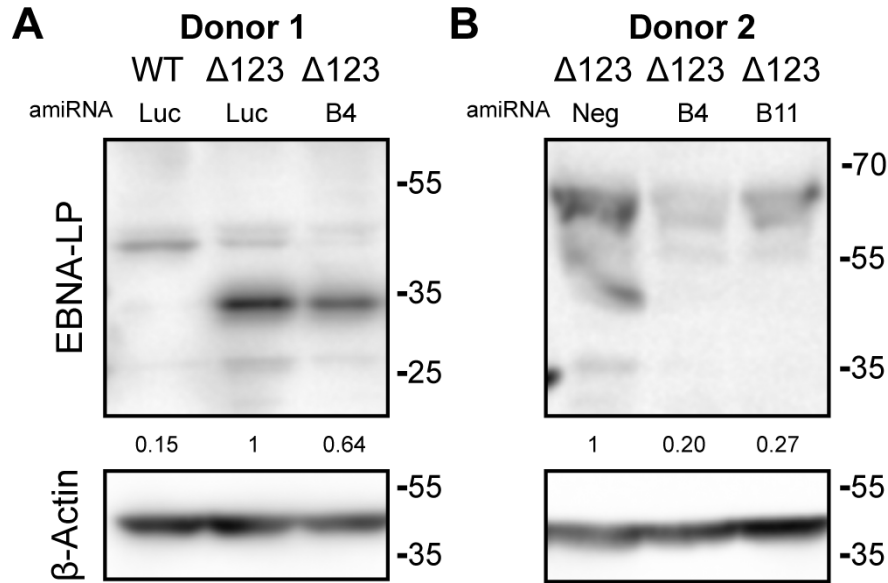

**Figure 6.** amiRNAs targeting the HF exon reduce EBNA-LP expression. (A) Donor one: WT and  $\Delta 123$  LCLs were transduced with a control FLuc (luc) amiRNA. The  $\Delta 123$  LCLs were also transduced with an amiRNA targeting the HF exon (B4). (B) Donor 2: only the  $\Delta 123$  LCLs were transduced with two amiRNAs targeting the HF exon (B4 and B11). These transduced LCLs are compared to the originating, non-transduced  $\Delta 123$  LCLs. Transduced cells were selected with puro and then induced with Dox for 4 days before lysates were harvested. Western blot analysis was then performed for EBNA-LP.  $\beta$ -Actin was used as a loading control. Fold knockdown relative to  $\Delta 123$  LCL expression is shown for EBNA-LP.

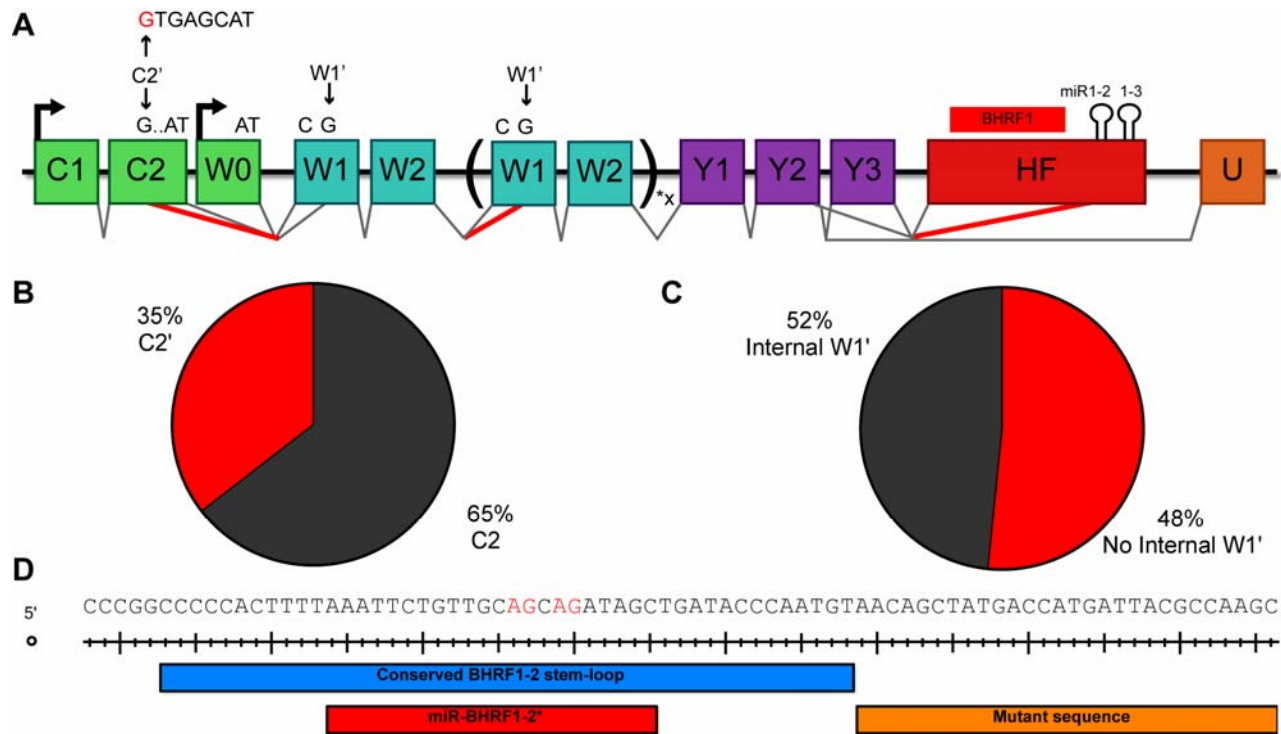

**Figure 7.** Novel alternative splicing patterns of Cp and Wp transcripts. (A) Schematic of all novel splice patterns observed in EBV strain B95-8 LCLs by PacBio sequencing. There is a novel 5' splice site in C2, termed C2', that is shown in red. Use of this splice site removes the last seven bases of C2. Splicing was also observed between W2 and W1', generating a frame shift in the EBNA-LP ORF that causes premature translation termination. The  $\Delta 123$  LCLs exhibit cryptic 3' splice sites in the mature miR-BHRF1-2 sequence, shown in red. This results in efficient splicing from the Y2 and Y3 exons to the miR-BHRF1-2 stem-loop. Percentages exhibited in the PacBio sequencing are shown for (B) C2' usage, (C) internal W2-W1' splicing. (D) Cryptic splice acceptor sites are shown in red. The portion of the pri-miR-BHRF1-2 stem-loop retained in the  $\Delta 123$  EBV mutant is indicated in blue, the mature miR-BHRF1-2\* sequence is shown in red, and the mutant sequence introduced by the  $\Delta 123$  deletion of the 3' side of the BHRF1-2 pri-miRNA is shown in orange.

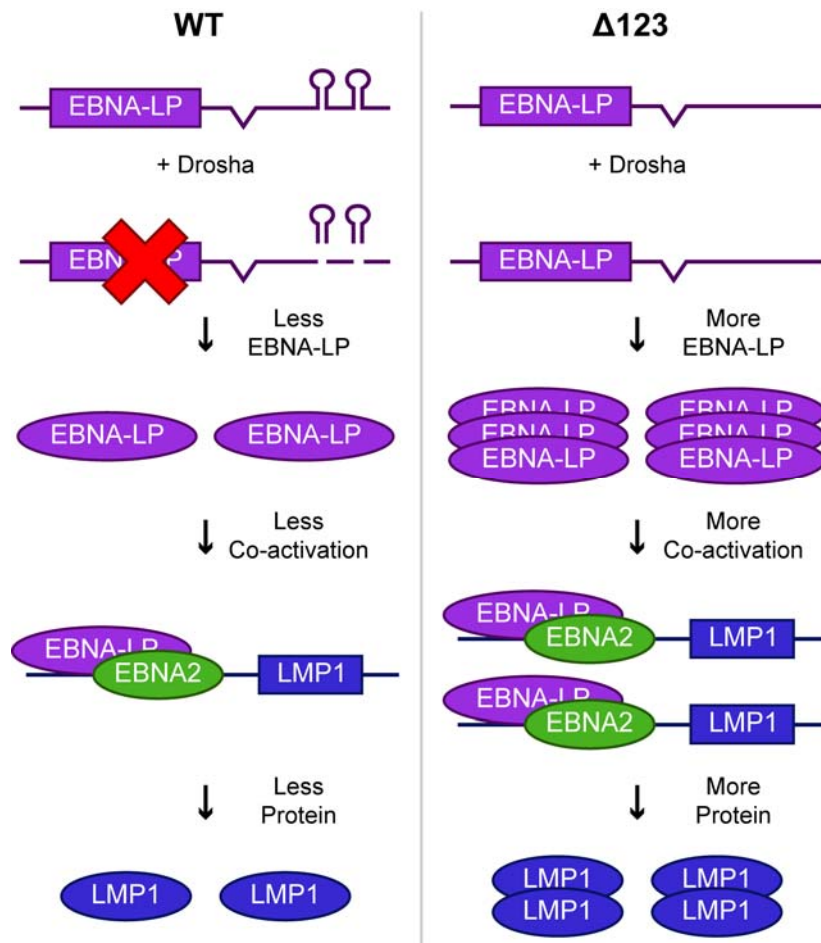

**Figure 8.** Model for how the pri-miR-BHRF1-2 and 1-3 miRNAs regulate EBV gene expression in *cis*. In the context of WT EBV infection (left side), pri-miR-BHRF1-2 and 1-3 form part of the 3'UTR of EBNA-LP mRNAs. Cleavage of these pri-miRNAs by Drosha leads to a decrease in EBNA-LP transcript levels and, hence, EBNA-LP transcription factor expression. This in turn leads to a lower level of expression of EBNA-LP regulated transcripts, such as LMP1, and their encoded proteins. In contrast, when pri-miR-BHRF1-2 and 1-3 are deleted (right side), in the EBV  $\Delta 123$  mutant, EBNA-LP and its downstream viral gene targets are overexpressed, resulting in reduced B cell transformation and slower LCL growth.

**Supplementary Table 1.** List of relevant sequences and primers.

| Primer # | Name          | Sequence                                                                                                                                            |
|----------|---------------|-----------------------------------------------------------------------------------------------------------------------------------------------------|
| 1        | amiRNA B4     | 5'-CTCGAGAAGGTATATTGCTGTTGACAGTGAGCGACGTGAGTTTTACGCCGGCGATTGGTGAA<br>GCCACAGATGCAATGGCCGGCCTAAACTCACGATGCCTACTGCCTCGGACTTCAAGGGGCTA<br>GAATTC -3'   |
| 2        | amiRNA B11    | 5'-CTCGAGAAGGTATATTGCTGTTGACAGTGAGCGCAGGAGGAAATGCTAAGAGTTATGGTGAA<br>GCCACAGATGCATAACTCTTACCATTTCTCCTCTGCCTACTGCCTCGGACTTCAAGGGGCTAG<br>AATTC -3'   |
| 3        | amiRNA Luc    | 5'-CTCGAGAAGGTATATTGCTGTTGACAGTGAGCGGACGTACGCCGATTACTTTCGAATGGTGAA<br>GCCACAGATGCATTCTGAAGTATTCCGCGTACGTGTGCCTACTGCCTCGGACTTCAAGGGGCTA<br>GAATTC-3' |
| 4        | BHRF1 3'UTR-F | 5'-CACTCGAGGCATTATAATTTAACCAAACAGT-3'                                                                                                               |
| 5        | BHRF1 3'UTR-R | 5'-CAGCGGCCGCCCCGTTAACATAACACATAGTATT-3'                                                                                                            |
| 6        | Nanoluc-F     | 5'-CAGCTAGCCACCATGGTCTTCACACTCGAAGAT-3'                                                                                                             |
| 7        | Nanoluc-R     | 5'-CACTCGAGTTACGCCAGAATGCGTTCGC-3'                                                                                                                  |
| 8        | LP-ATG-F      | CATCCGGACTGCACGTGAGCATGGGAGACCGA                                                                                                                    |
| 9        | LP-pSG5-F     | 5'-CAACCGGTAGGTCATAAGAATTCATGGGAGAC-3'                                                                                                              |
| 10       | LP-pSG5-R     | 5'-ACGCGTAATCCTGCACTCGACTCTAGAGGATCT-3'                                                                                                             |
| 11       | GAPDH-F       | 5'-AAGTATGACAACAGCCTCAAGA-3'                                                                                                                        |
| 12       | GAPDH-R       | 5'-CACCACCTTCTTGATGTCATCA-3'                                                                                                                        |
| 13       | B-Actin-F     | 5'-CACACCTTCTACAATGAGCTGCGTG-3'                                                                                                                     |
| 14       | B-Actin-R     | 5'-ATGATCTGGGTCATCTTCTCGCGGT-3'                                                                                                                     |

|    |                         |                                          |
|----|-------------------------|------------------------------------------|
| 15 | SETDB1-F                | 5'-TCCATGGCATGCTGGAGCGG-3'               |
| 16 | SETDB1-R                | 5'-GAGAGGGTTCTTGCCCCGGT-3'               |
| 17 | LMP1-F                  | 5'-AATTTGCACGGACAGGCATT-3'               |
| 18 | LMP1-R                  | 5'-AAGGCCAAAAGCTGCCAGAT-3'               |
| 19 | EBNA2-F                 | 5'-GCTTAGCCAGTAACCCAGCACT-3'             |
| 20 | EBNA2-R                 | 5'-TGCTTAGAAGGTTGTTGGCATG-3'             |
| 21 | W2-oligo pulldown       | 5'-CTTCTTAGGAGCTGTCCGAG-3'               |
| 22 | U6-Northern probe       | 5'-CGTTCCAATTTTAGTATATGTGCTGCCGAAGCGA-3' |
| 23 | BHRF1-2 Northern probe  | 5'-TCAATTTCTGCCGCAAAGATA                 |
| 24 | BHRF1-2* Northern probe | 5'-GCTATCTGCTGCAACAGAATTT-3'             |
| 25 | BHRF1-3 Northern probe  | 5'-TGTGCTTACACACTTCCCGTTA-3'             |
| 26 | LP-shallow-F            | 5'-CAACTAGTCCTCCTGCACGTGAGCATGGGAG-3'    |
| 27 | LP-shallow-R            | 5'-CACTGCAGCATTTCTCCTCCCCCGAGTCTG-3'     |
